# Supplementary material for: The windmill, the dragon, and the frog: geometry control over the spectral, magnetic, and electrochemical properties of cobalt phthalocyanine regioisomers
Source: Royal Society of Chemistry journal article supplement (doi:10.1039/d4cp01564a), 2024-01-01
Supplement: d4cp01564a1.pdf [file d4cp01564a1.pdf]

## **Supporting Information**

### **The Windmill, the Dragon, and the Frog: geometry control over the spectral, magnetic, and electrochemical properties of cobalt phthalocyanine regioisomers**

Nikolai Tkachenko, Viacheslav Golovanov, Aleksandr Penni, Sami Vesamäki, M. R. Ajayakumar, Atsuya Muranaka, Nagao Kobayashi, and Alexander Efimov

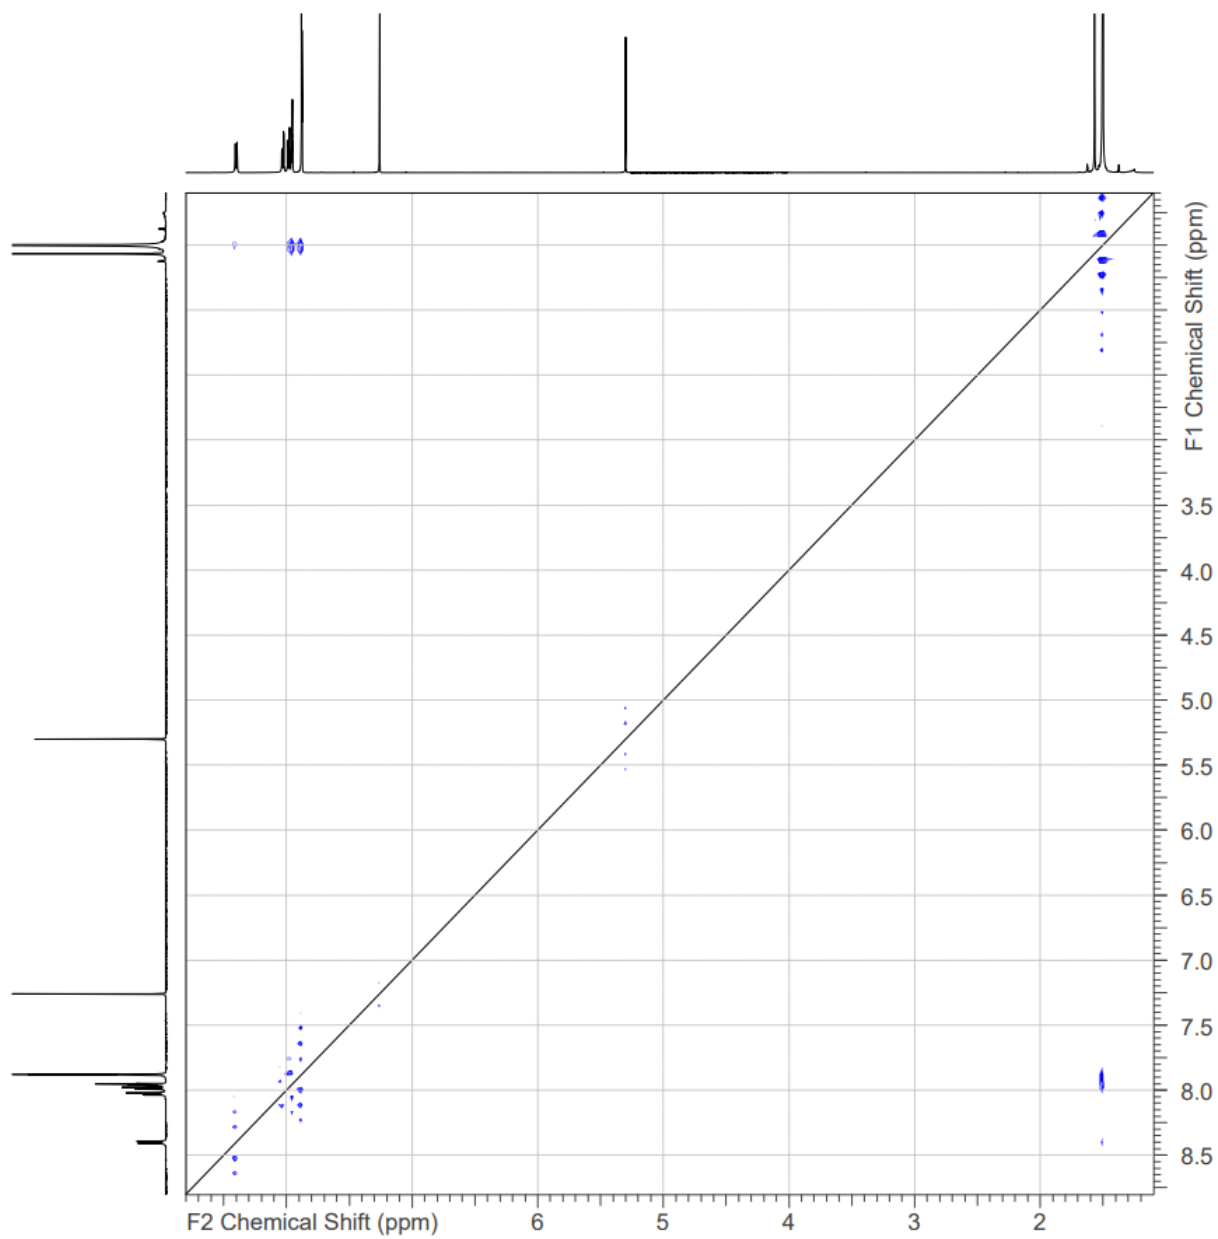

**Fig. S1.**  $^1\text{H}$ - $^1\text{H}$  NOESY NMR spectrum (500 MHz,  $\text{CDCl}_3$ ) of  $\text{H}_2\text{Pc}$ -Windmill.

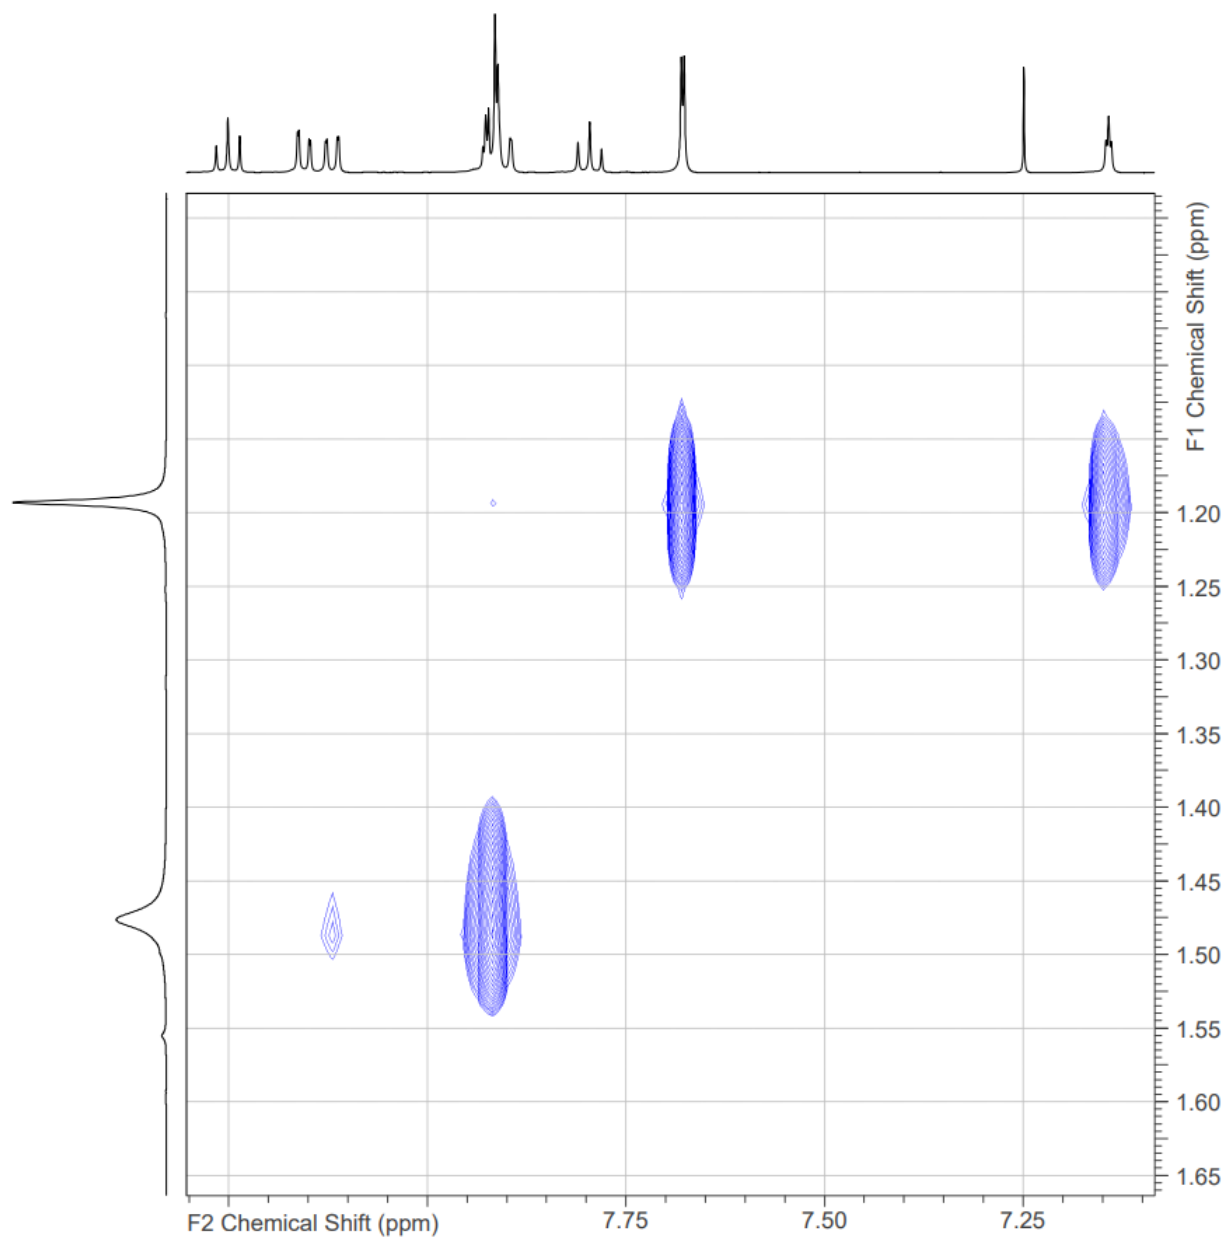

**Fig. S2.**  $^1\text{H}$ - $^1\text{H}$  NOESY NMR spectrum (500 MHz,  $\text{CDCl}_3$ ) of  $\text{H}_2\text{Pc-Frog}$ .

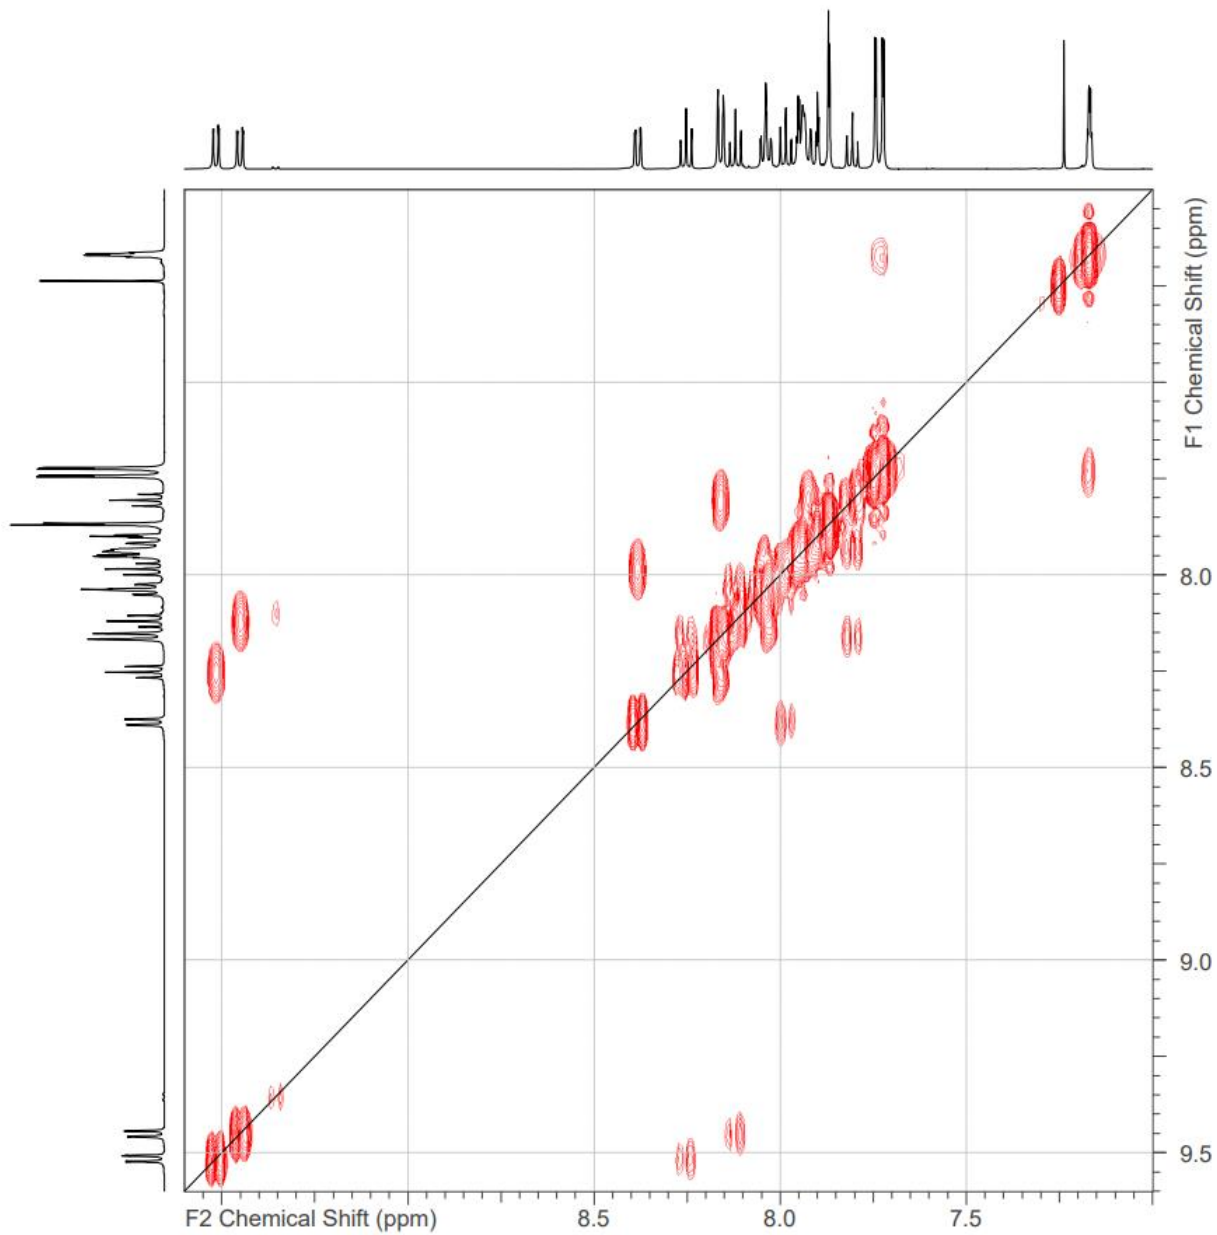

**Fig. S3.**  $^1\text{H}$ - $^1\text{H}$  COSY NMR spectrum (500 MHz,  $\text{CDCl}_3$ ) of **H<sub>2</sub>Pc-Dragon**.

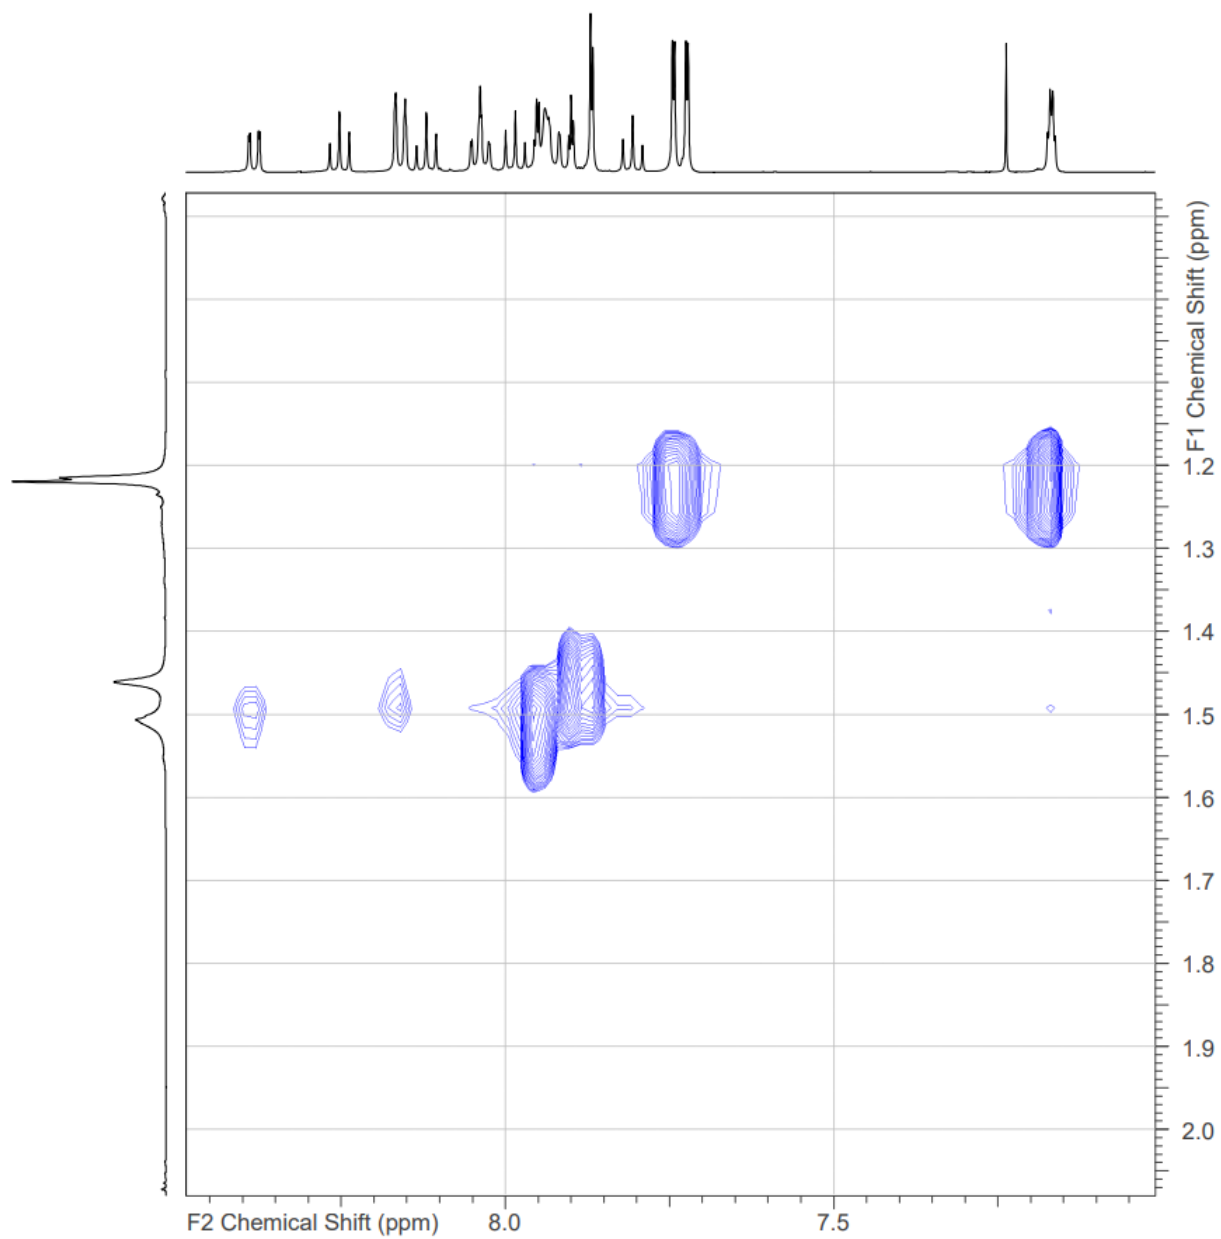

**Fig. S4.**  $^1\text{H}$ - $^1\text{H}$  NOESY NMR spectrum (500 MHz,  $\text{CDCl}_3$ ) of  $\text{H}_2\text{Pc-Dragon}$ .

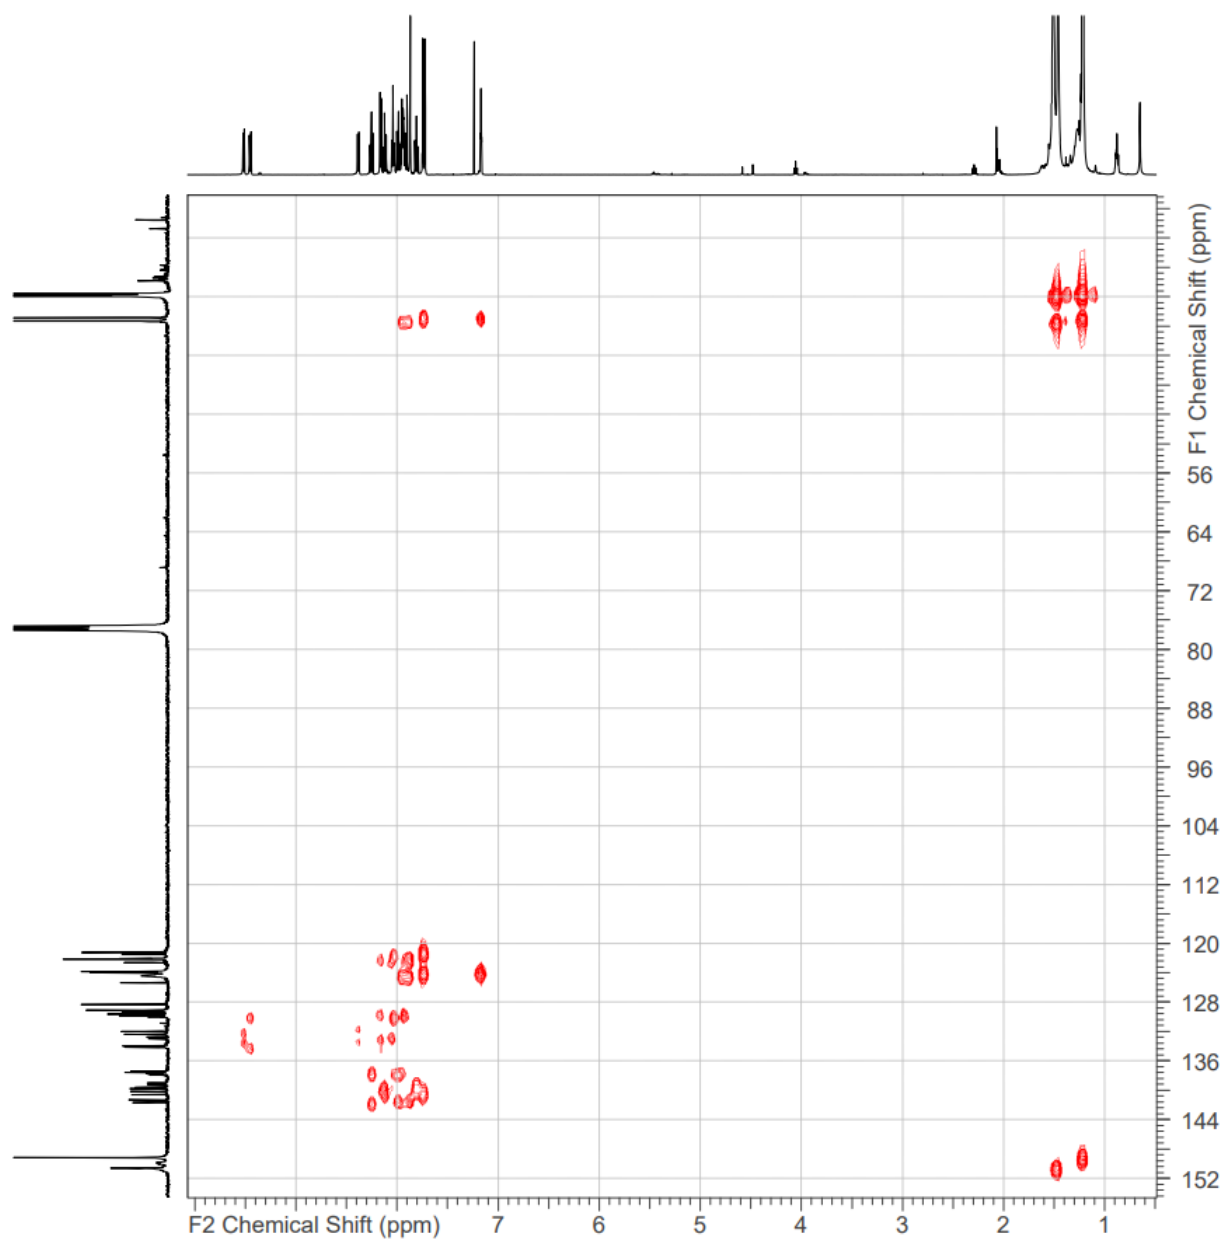

**Fig. S5.**  $^1\text{H}$ - $^{13}\text{C}$  HMBC NMR spectrum (500 MHz,  $\text{CDCl}_3$ ) of  $\text{H}_2\text{Pc-Dragon}$ .

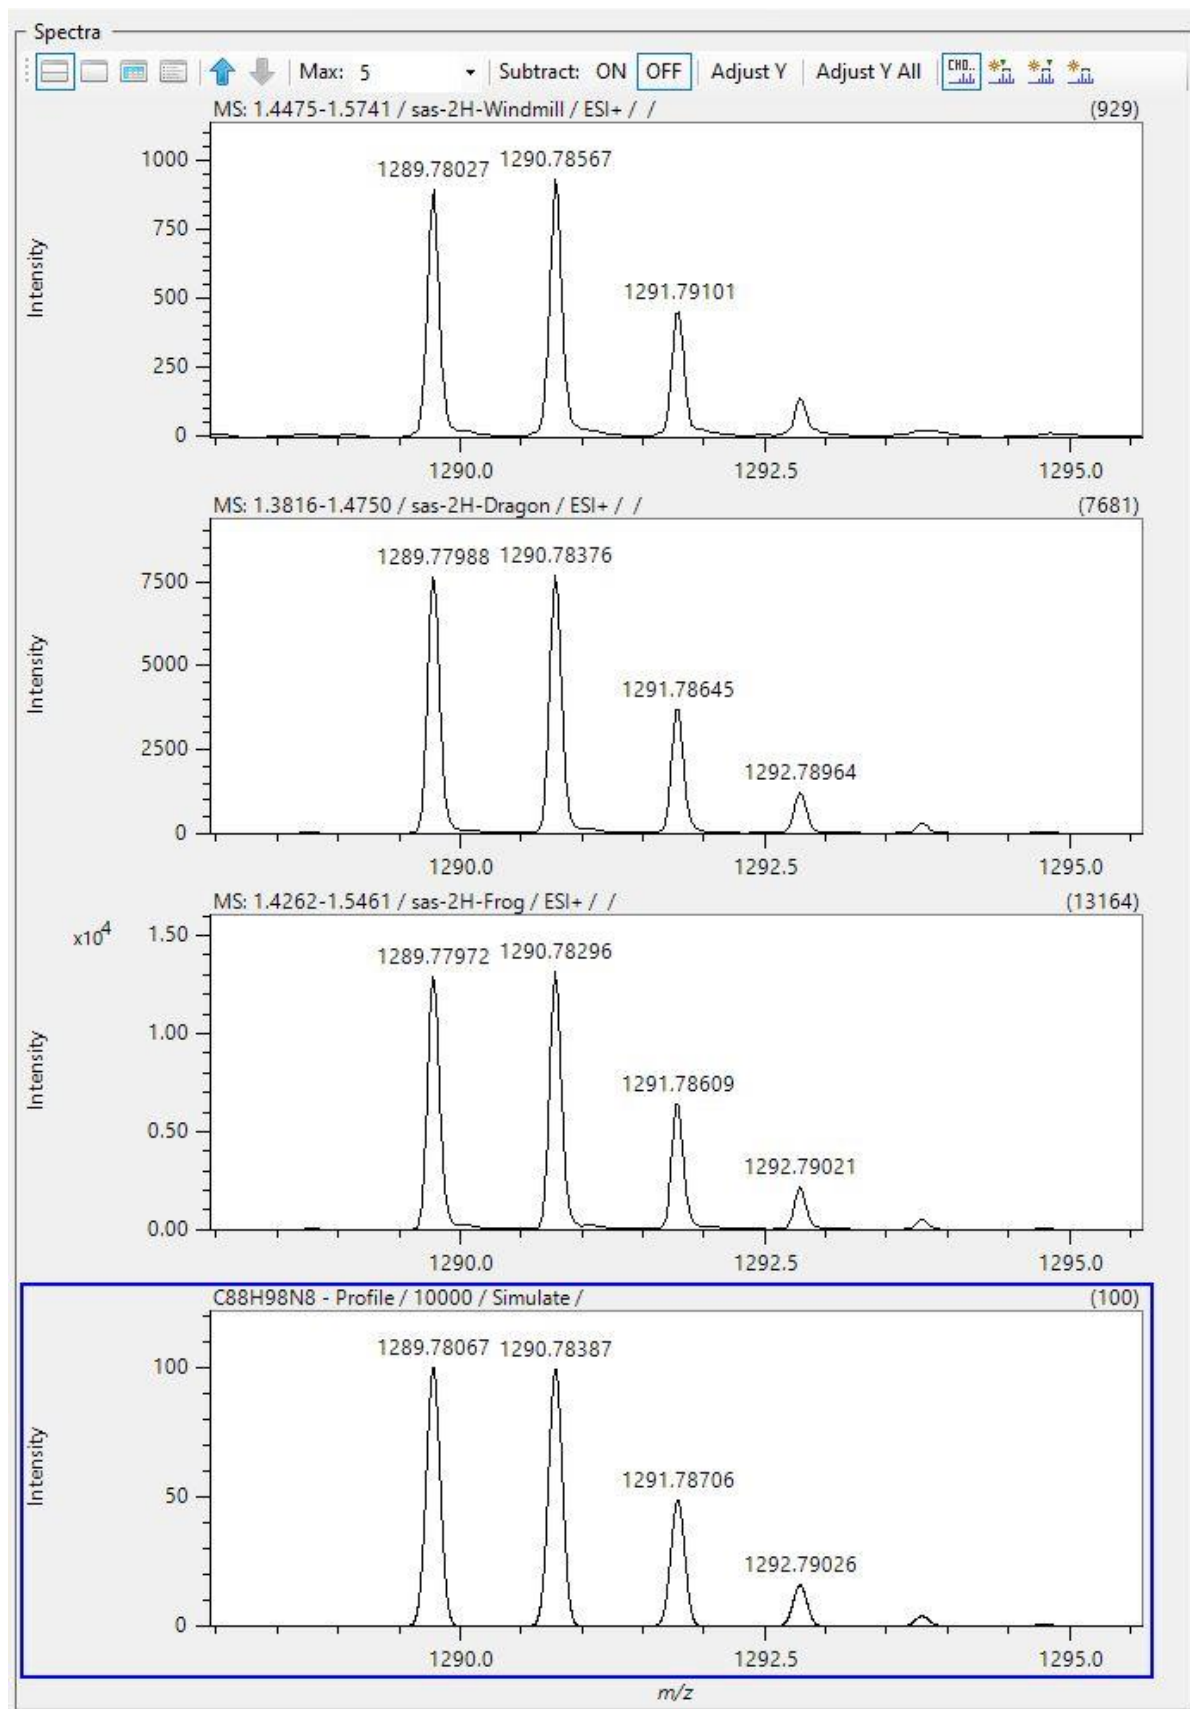

**Fig. S6a.** High-resolution ESI-TOF mass spectra of **H<sub>2</sub>Pc-Windmill**, **H<sub>2</sub>Pc-Dragon**, and **H<sub>2</sub>Pc-Frog** vs. the  $[M+Na]^+$  ( $C_{88}H_{98}N_8Na^+$ ) isotope model (bottom).

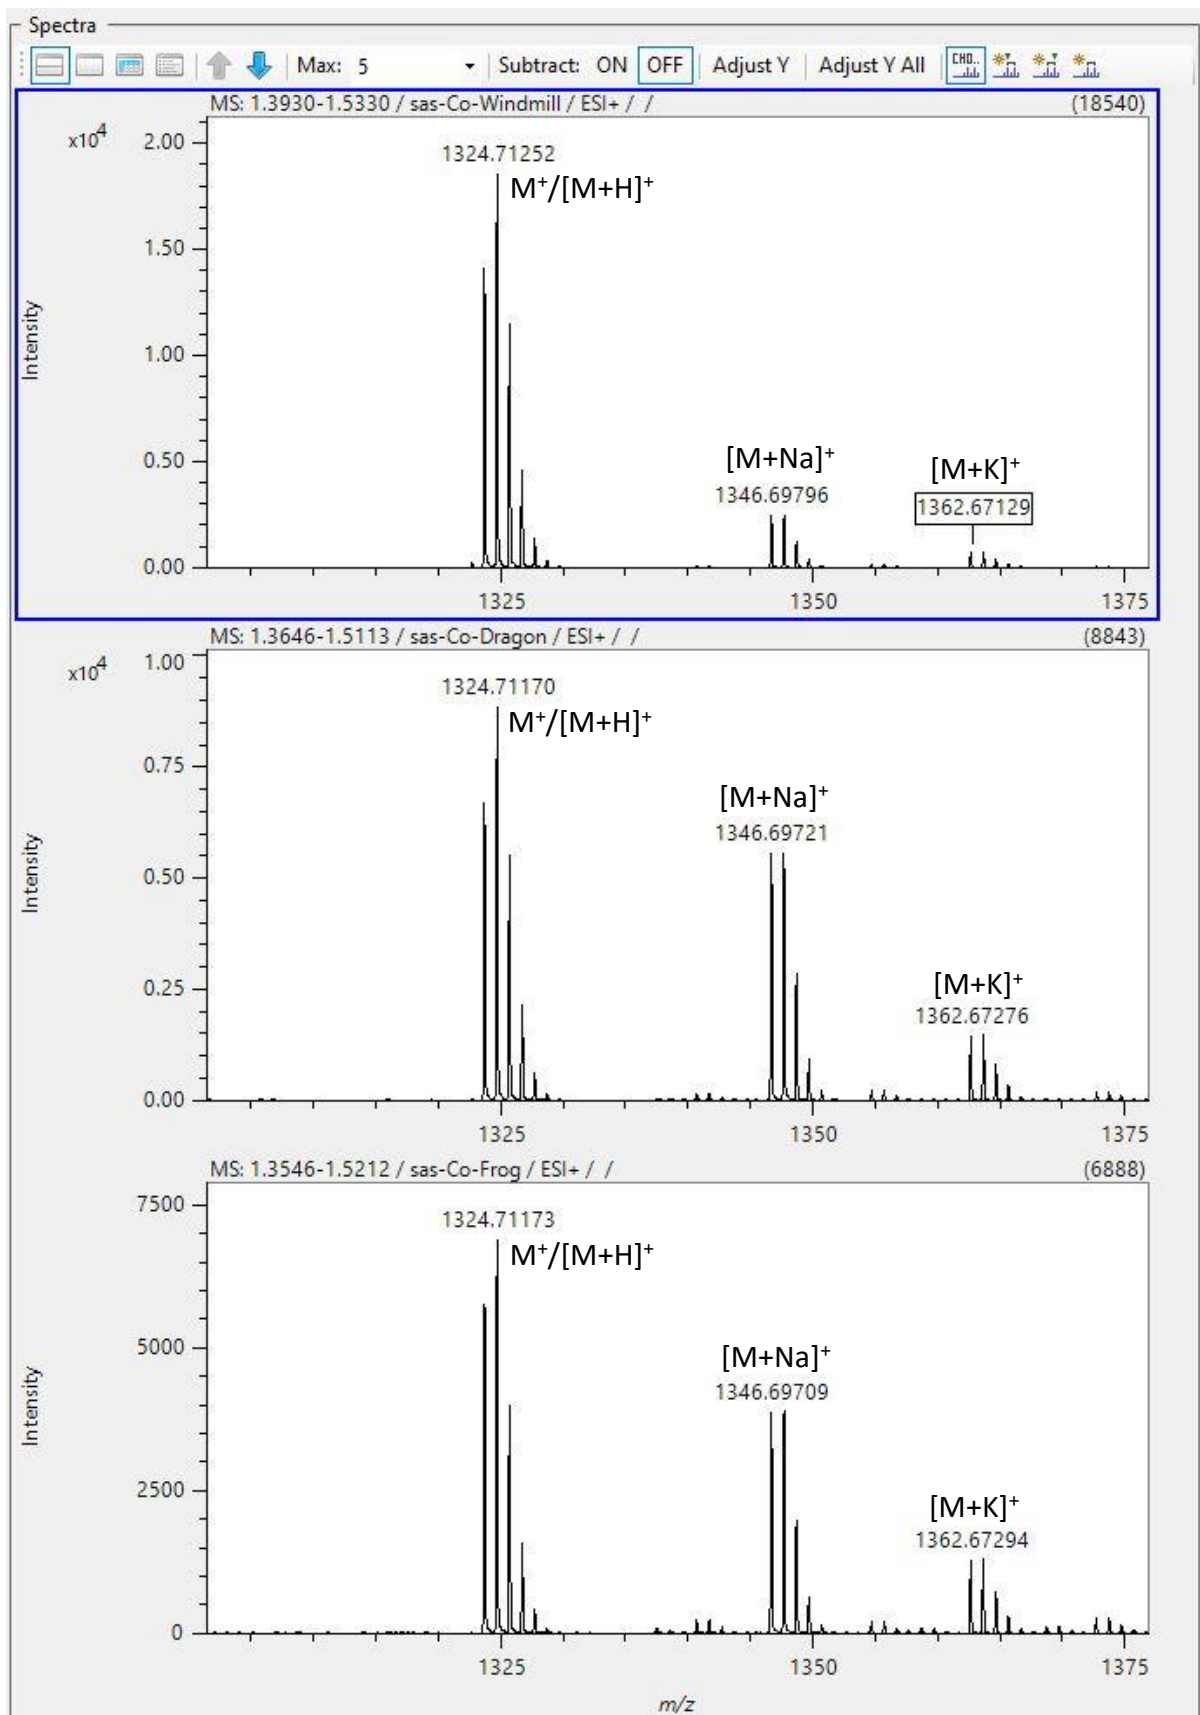

**Fig. S6b.** High-resolution ESI-TOF mass spectra of **CoPc-Windmill**, **CoPc-Dragon**, and **CoPc-Frog** showing the  $M^+/[M+H]^+$ ,  $[M+Na]^+$  and  $[M+K]^+$  signals.



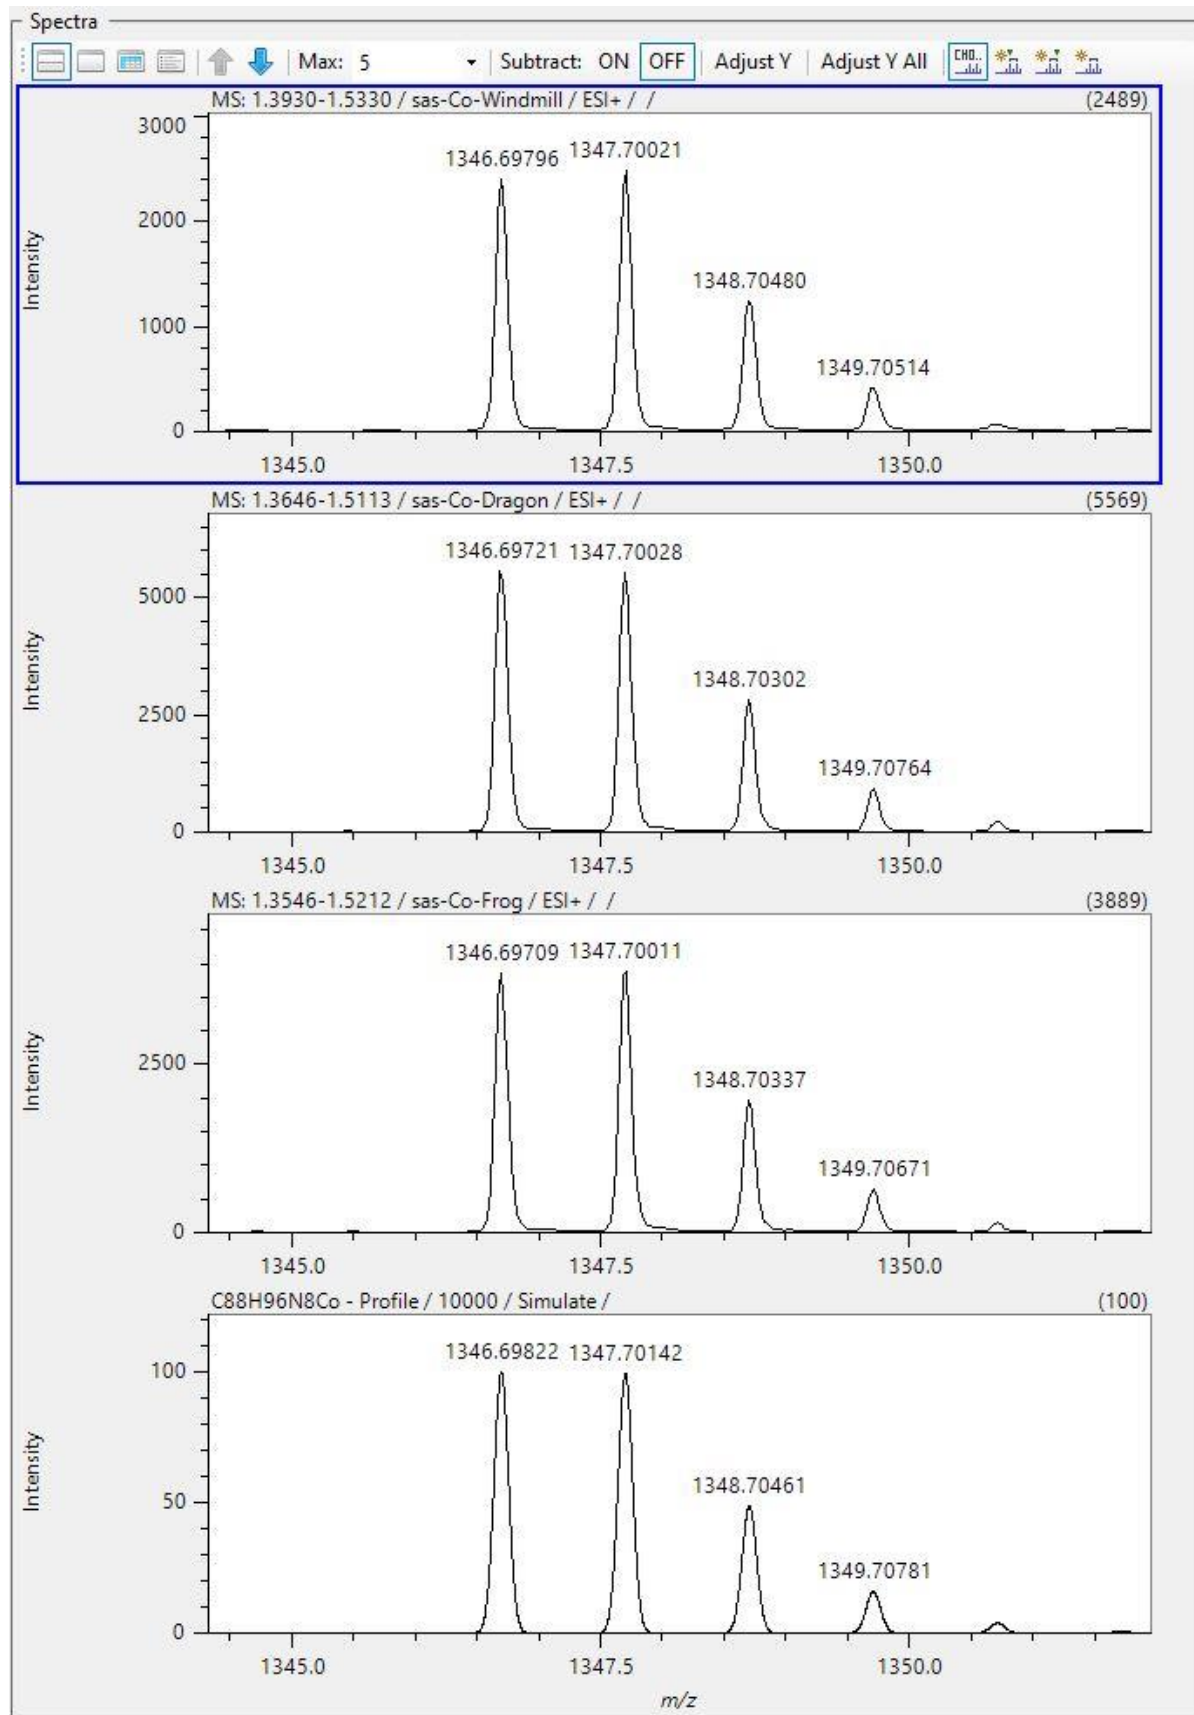

**Fig. S6c.** High-resolution ESI-TOF mass spectra of **CoPc-Windmill**, **CoPc-Dragon**, and **CoPc-Frog** vs. the  $[M+Na]^+$  ( $C_{88}H_{96}N_8CoNa^+$ ) isotope model (bottom).

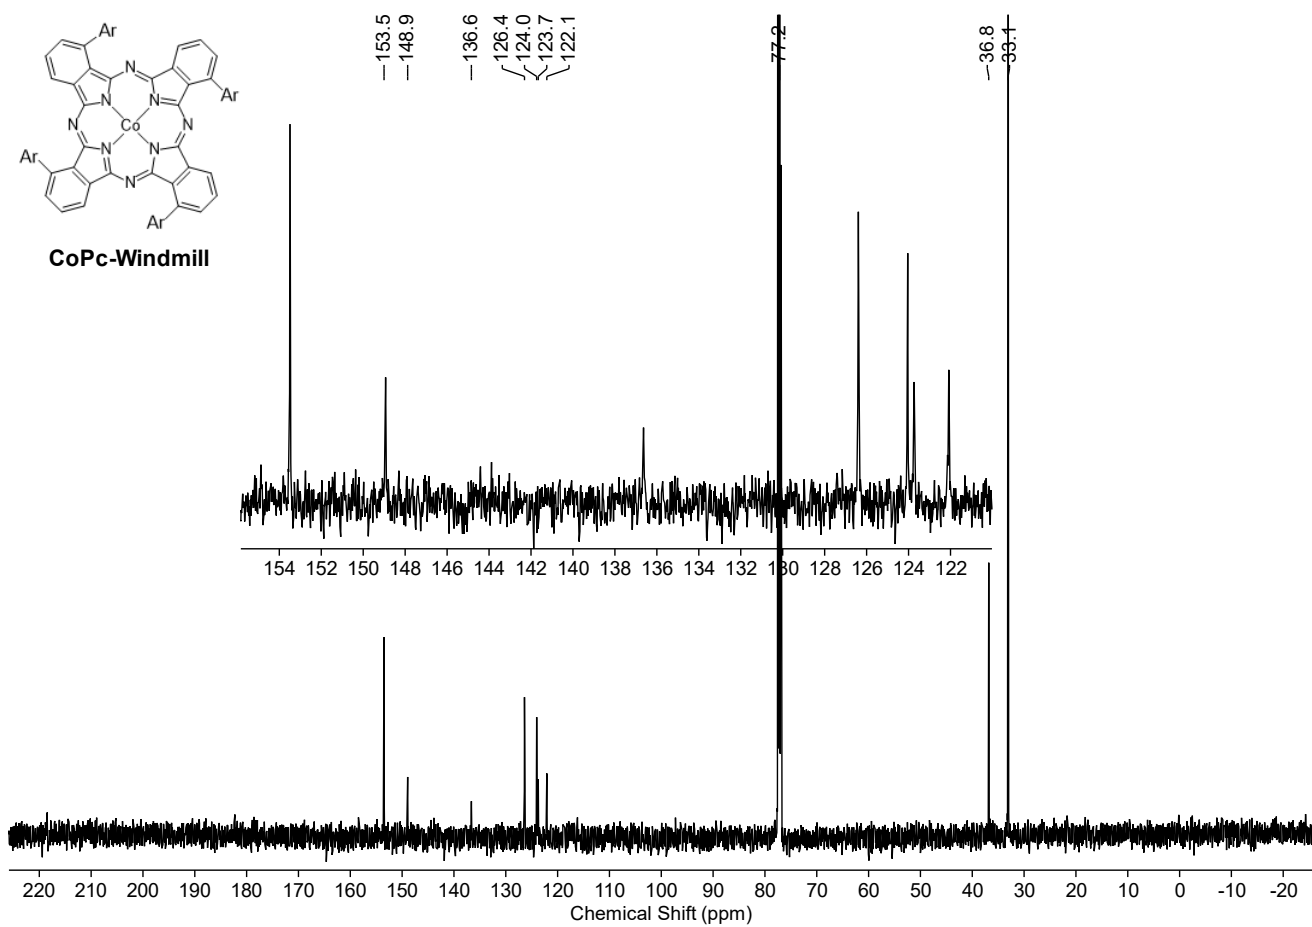

**Fig. S7.**  $^{13}\text{C}\{^1\text{H}\}$  NMR spectrum (126 MHz,  $\text{CDCl}_3$ ) of **CoPc-Windmill**.

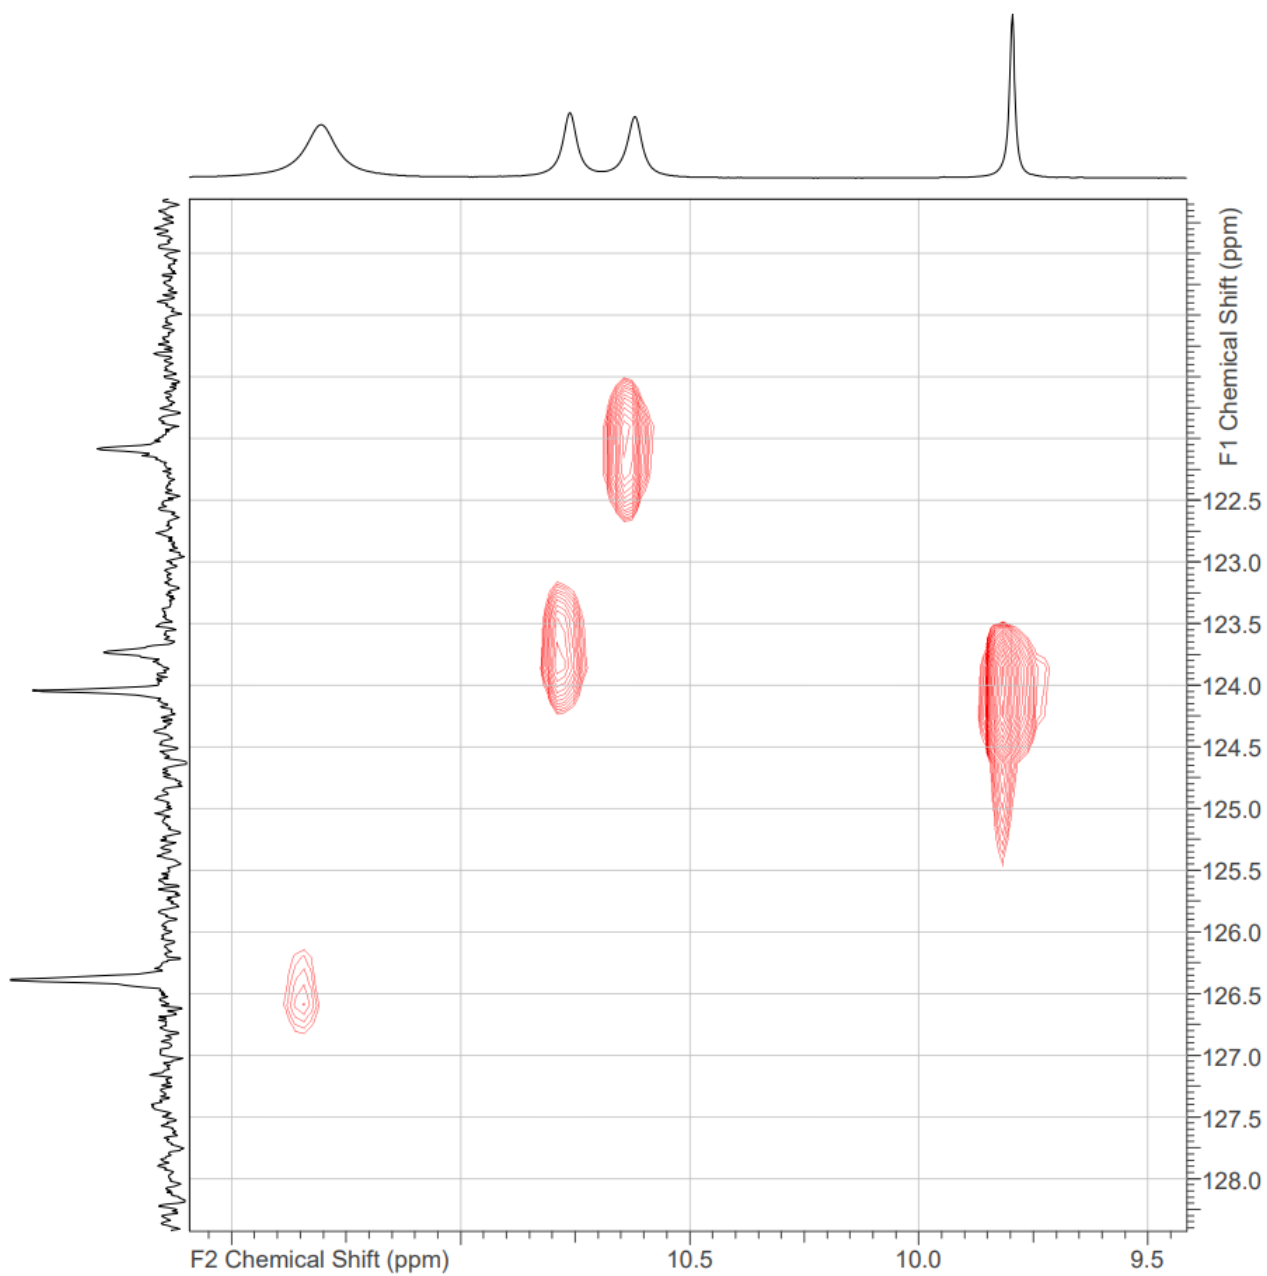

**Fig. S8.**  $^1\text{H}$ - $^{13}\text{C}$  HSQC NMR spectrum (500 MHz,  $\text{CDCl}_3$ ) of **CoPc-Windmill**.

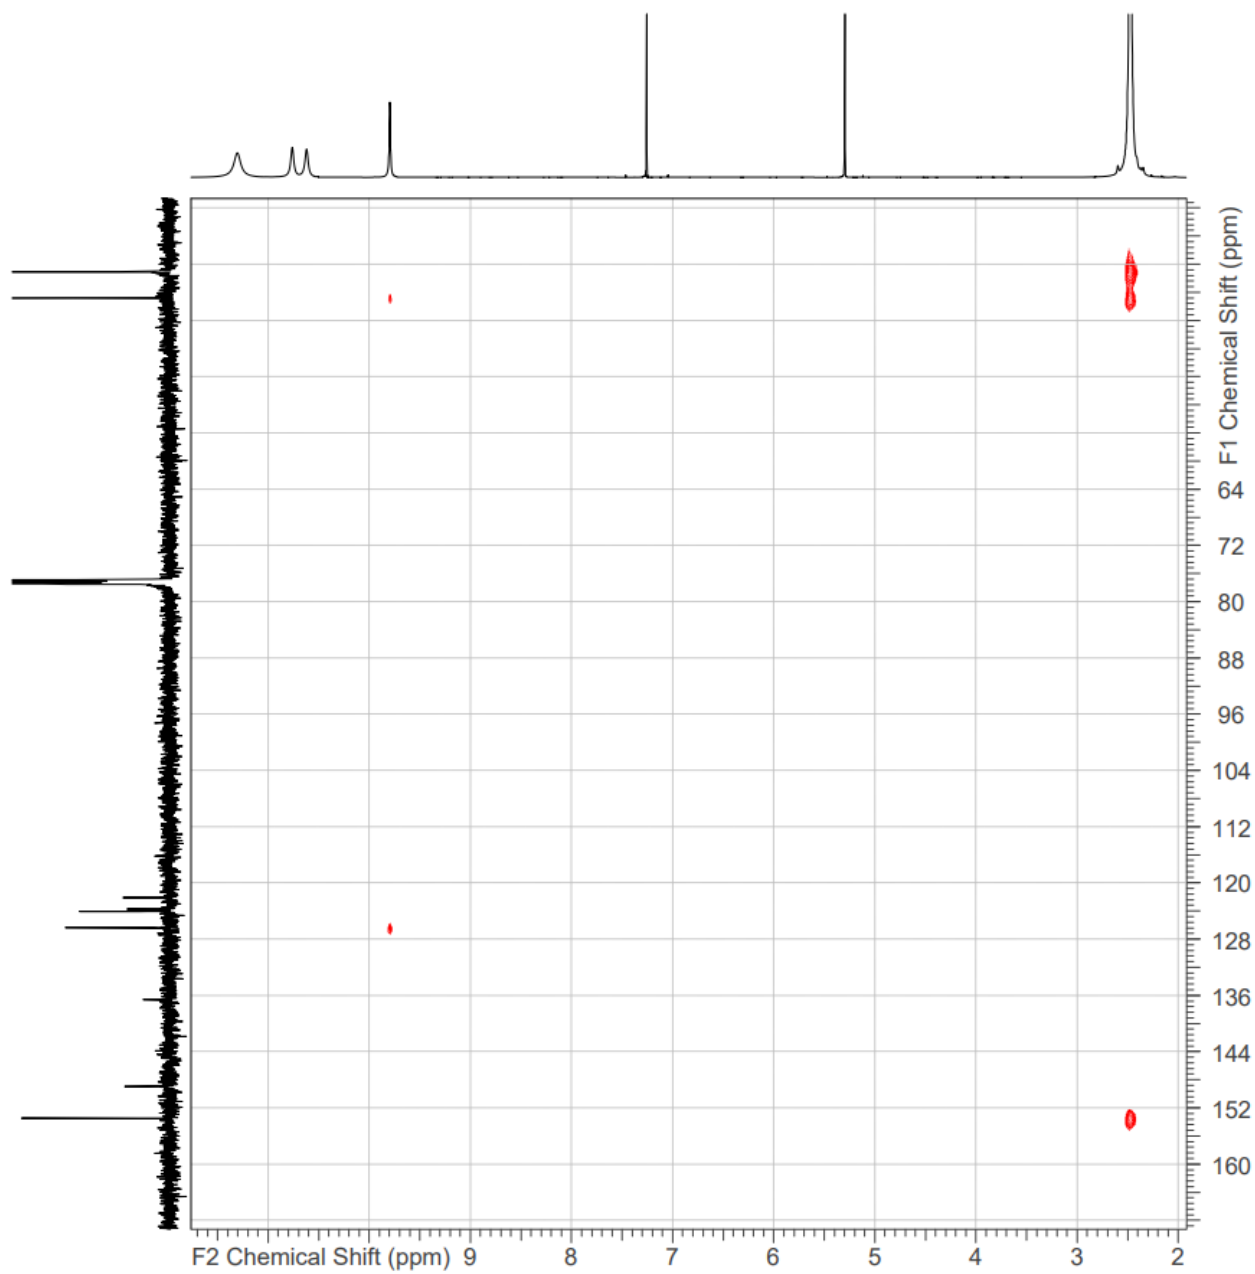

**Fig. S9.**  $^1\text{H}$ - $^{13}\text{C}$  HMBC NMR spectrum (500 MHz,  $\text{CDCl}_3$ ) of CoPc-Windmill.

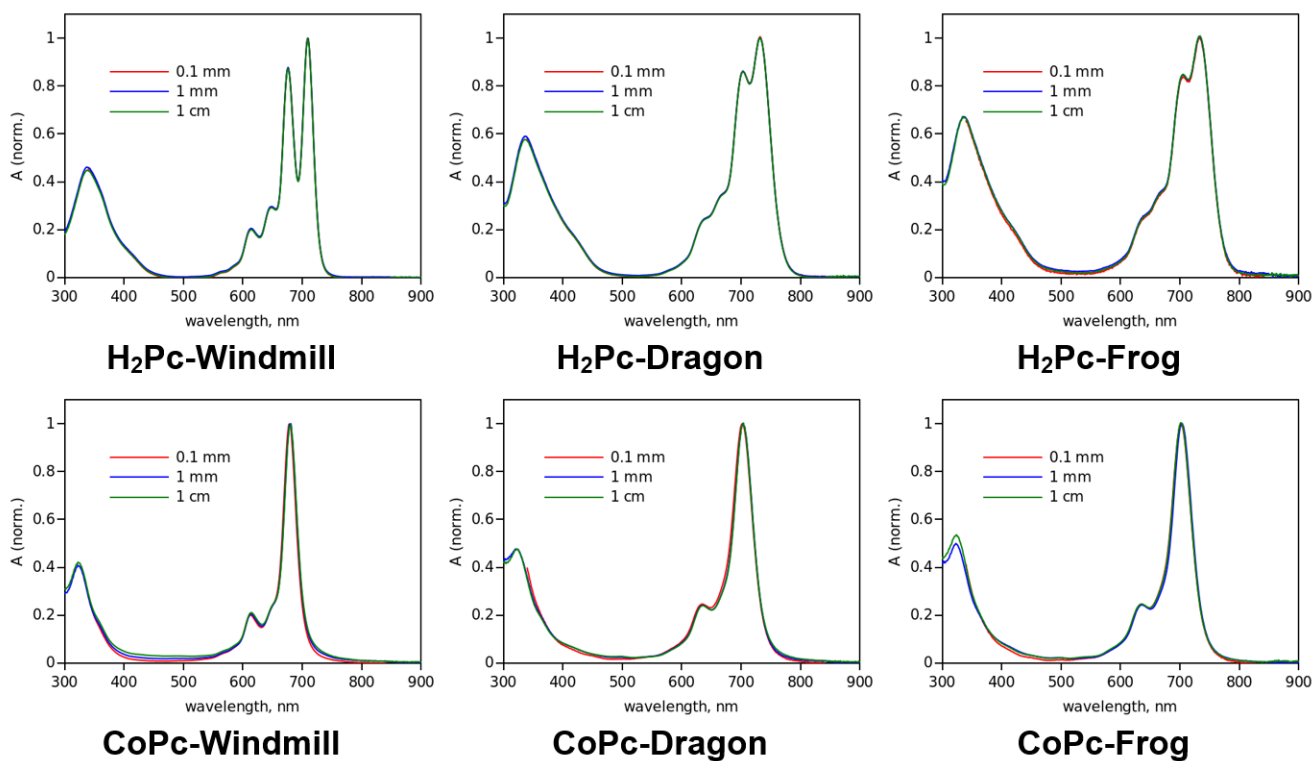

**Fig. S10.** Normalized absorption spectra of the compounds in chloroform measured at concentrations of approx. 0.01 mM (1 cm cuvette), 0.1 mM (1 mm cuvette) and 1 mM (0.1 mm cuvette).

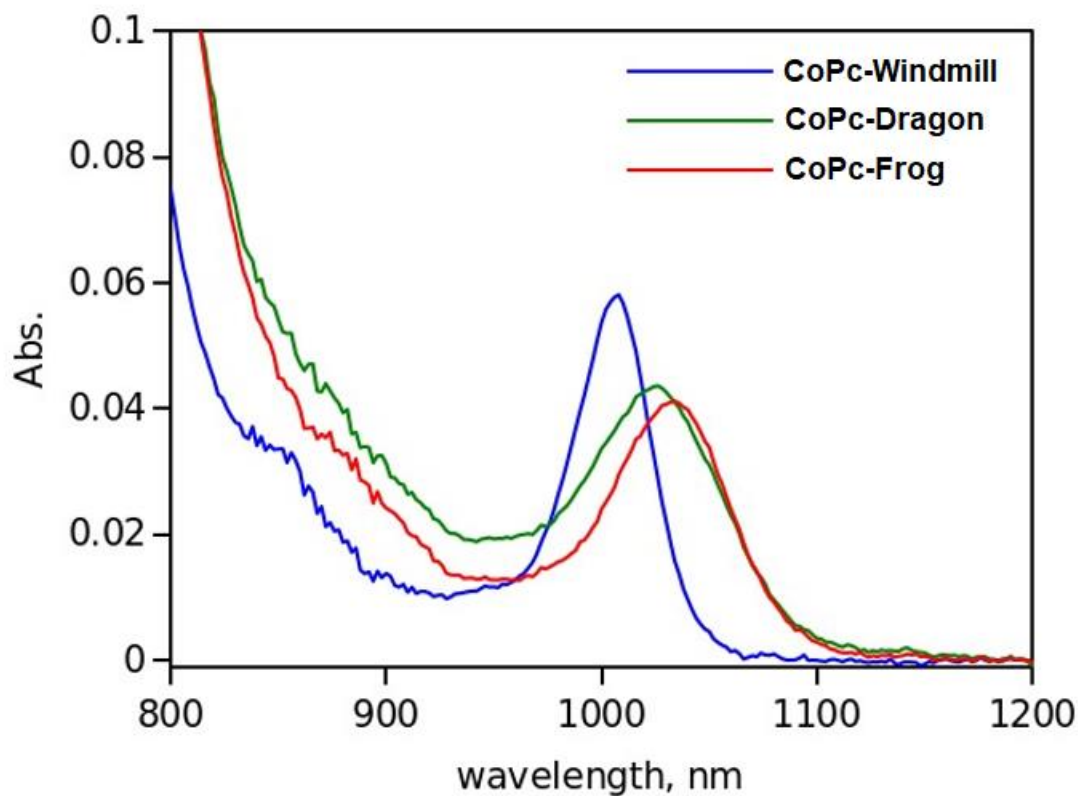

**Fig. S11.** NIR absorption spectra of **CoPc-Windmill**, **CoPc-Dragon**, and **CoPc-Frog** in toluene.

|                        | <b>H<sub>2</sub>Pc-<br/>Windmill</b><br>solution | <b>H<sub>2</sub>Pc-<br/>Windmill</b><br>film | <b>H<sub>2</sub>Pc-<br/>Dragon</b><br>solution | <b>H<sub>2</sub>Pc-<br/>Dragon</b><br>film | <b>H<sub>2</sub>Pc-<br/>Frog</b><br>solution | <b>H<sub>2</sub>Pc-<br/>Frog</b><br>film |
|------------------------|--------------------------------------------------|----------------------------------------------|------------------------------------------------|--------------------------------------------|----------------------------------------------|------------------------------------------|
| $\lambda_{\max}$ , nm  | 708.0                                            | 717.1                                        | 729.5                                          | 740.2                                      | 730.1                                        | 740.6                                    |
| $\Delta\lambda_G$ , nm | 8.1                                              | 14.8                                         | 14.9                                           | 23.8                                       | 16.1                                         | 24.8                                     |
| rel. ampl.             | 2.51                                             | 1.29                                         | 2.00                                           | 1.04                                       | 1.90                                         | 1.08                                     |
| $\lambda_{\max}$ , nm  | 674.8                                            | 679.5                                        | 696.2                                          | 699.4                                      | 695.9                                        | 699.6                                    |
| $\Delta\lambda_G$ , nm | 8.6                                              | 11.5                                         | 9.6                                            | 11.8                                       | 9.7                                          | 11.9                                     |
| rel. ampl.             | 2.14                                             | 0.88                                         | 1.54                                           | 0.46                                       | 1.36                                         | 0.39                                     |
| $\lambda_{\max}$ , nm  | 645.3                                            | 649.9                                        | 665.9                                          | 669.0                                      | 665.8                                        | 670.1                                    |
| $\Delta\lambda_G$ , nm | 12.1                                             | 15.9                                         | 16.4                                           | 17.7                                       | 16.8                                         | 19.7                                     |
| rel. ampl.             | 0.68                                             | 0.55                                         | 0.67                                           | 0.39                                       | 0.64                                         | 0.39                                     |
| $\lambda_{\max}$ , nm  | 612.3                                            | 612.6                                        | 628.7                                          | 633.1                                      | 628.6                                        | 633.0                                    |
| $\Delta\lambda_G$ , nm | 12.3                                             | 12.2                                         | 12.9                                           | 11.7                                       | 13.1                                         | 11.9                                     |
| rel. ampl.             | 0.47                                             | 0.35                                         | 0.41                                           | 0.17                                       | 0.38                                         | 0.15                                     |
| $\lambda_{\max}$ , nm  |                                                  | 718.8                                        |                                                | 730.5                                      |                                              | 736.9                                    |
| $\Delta\lambda_G$ , nm |                                                  | 67.1                                         |                                                | 125.5                                      |                                              | 124.8                                    |
| rel. ampl.             |                                                  | 0.28                                         |                                                | 0.32                                       |                                              | 0.31                                     |

**Table S1.** Results of the Gaussian fits for the Q band regions of **H<sub>2</sub>Pc-Windmill**, **H<sub>2</sub>Pc-Dragon**, and **H<sub>2</sub>Pc-Frog** as solutions in toluene and films on glass substrates.

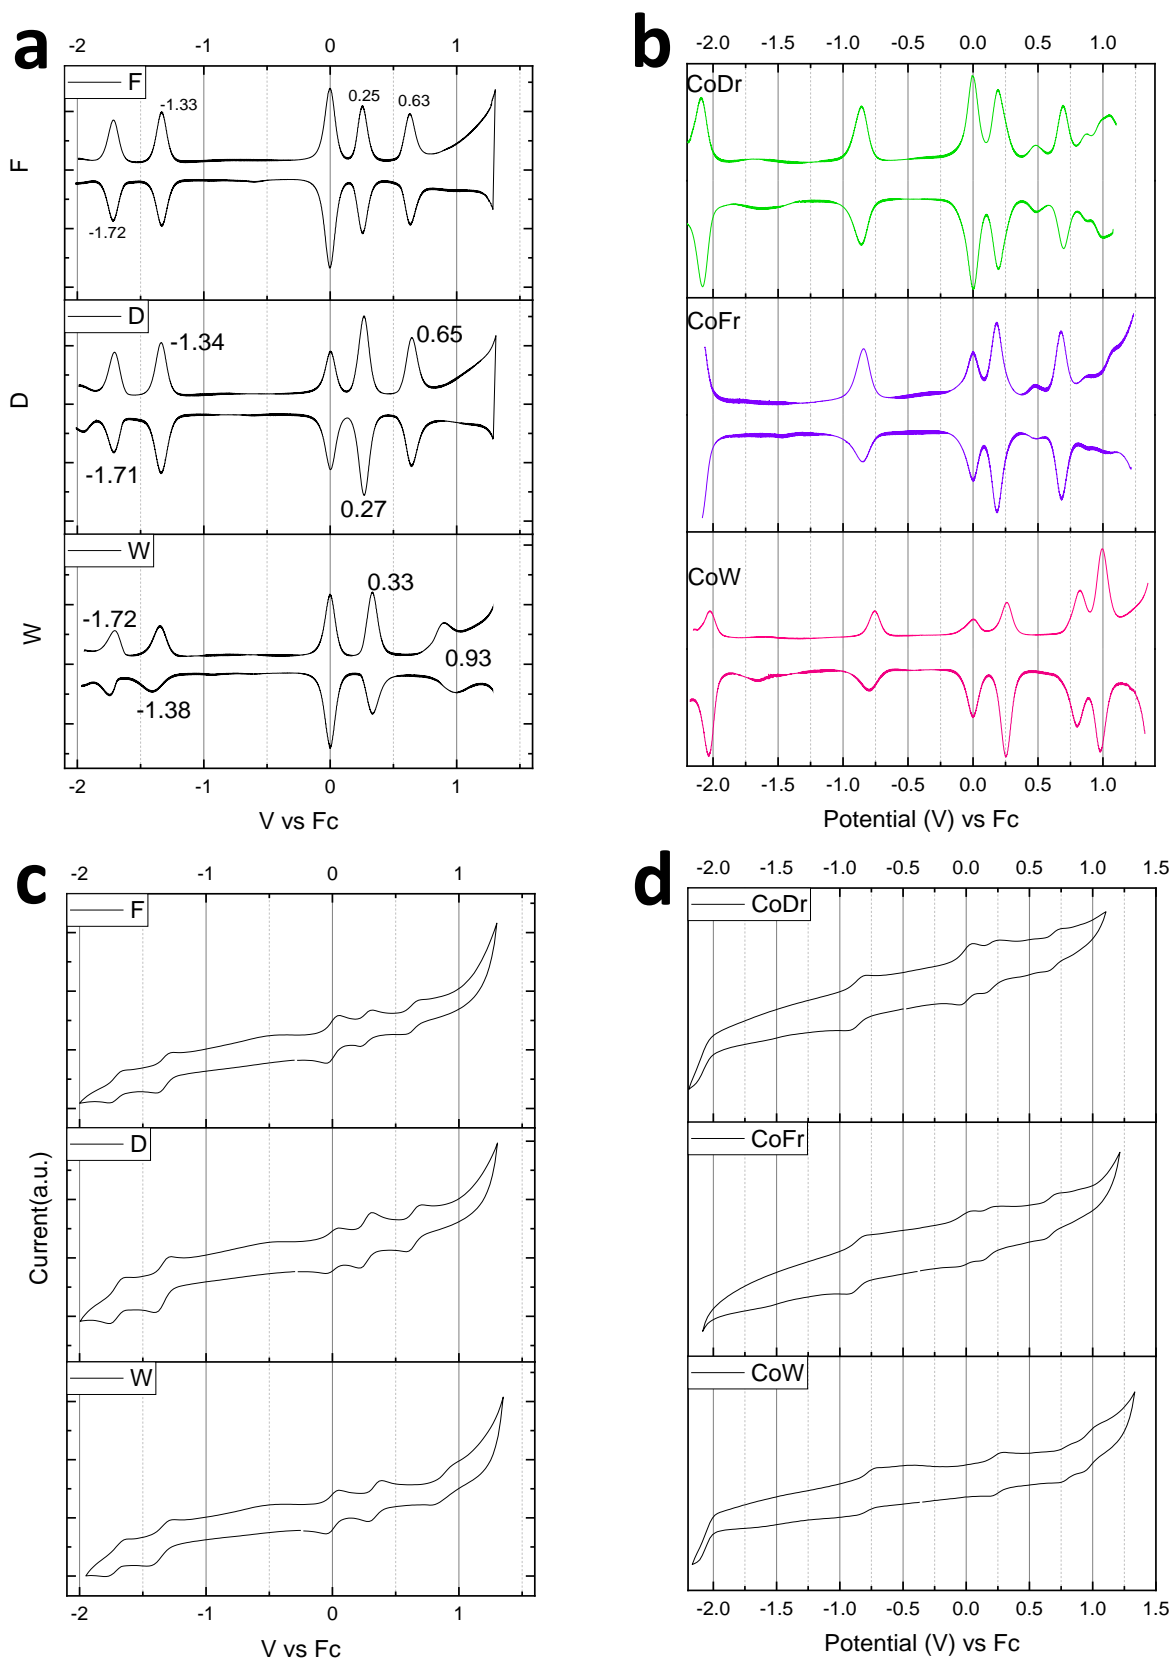

**Fig. S12.** DPV curves (**a, b**) and CV curves (**c, d**) for the free base phthalocyanines and Co complexes. Solutions in DCM with  $\text{Bu}_4\text{NPF}_6$ , 200 mV scan rate.

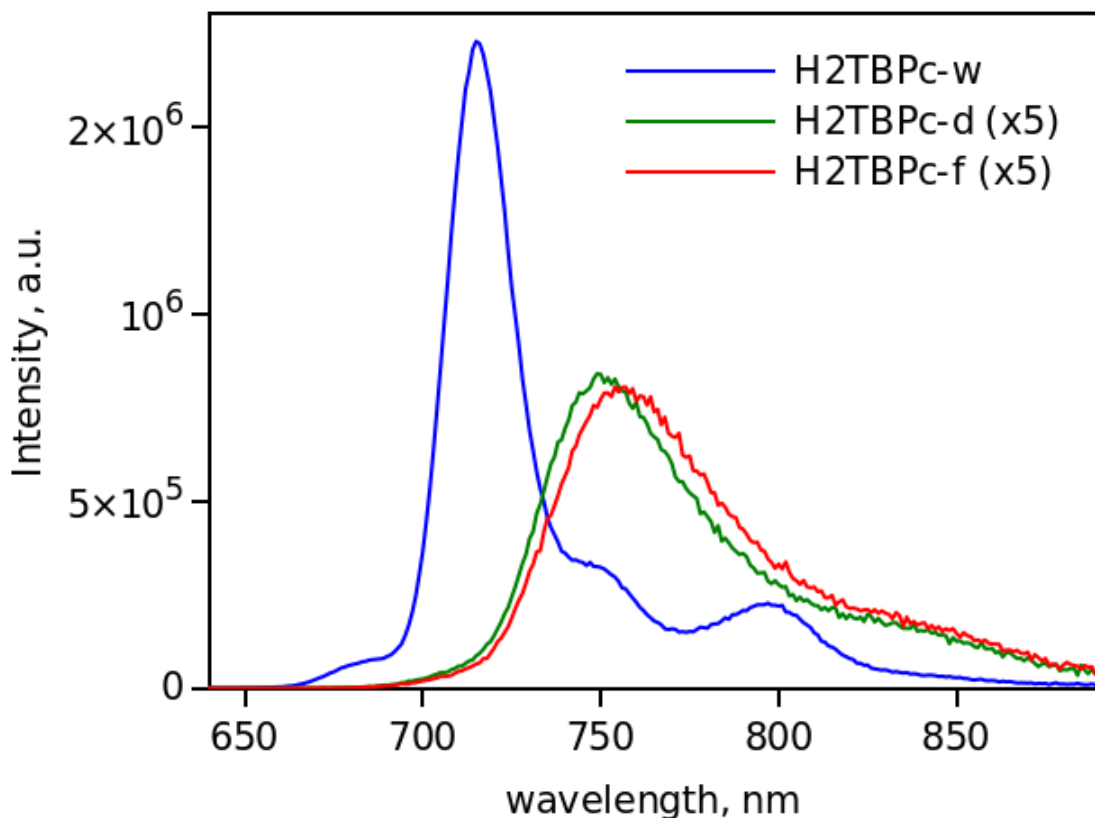

**Fig. S13.** Emission spectra of **H<sub>2</sub>Pc-Windmill**, **H<sub>2</sub>Pc-Dragon**, and **H<sub>2</sub>Pc-Frog**. Excitation wavelength is 340 nm.

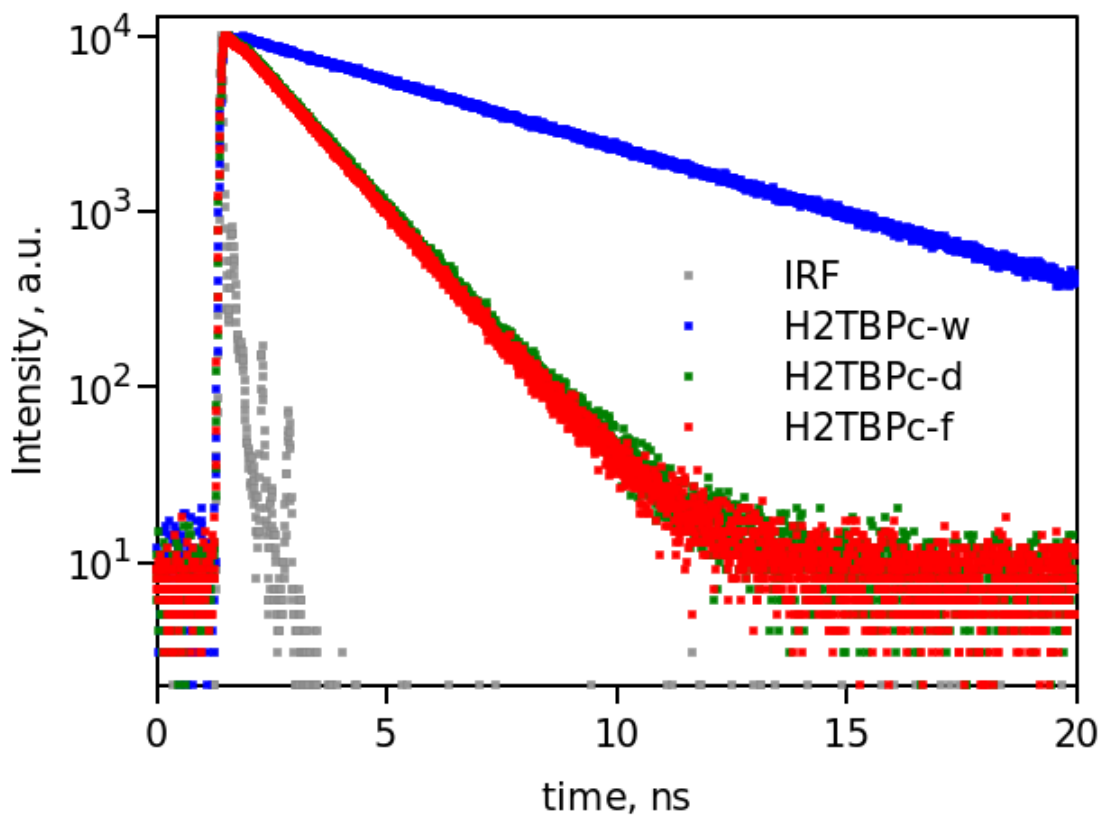

**Fig. S14.** Emission decays of **H<sub>2</sub>Pc-Windmill**, **H<sub>2</sub>Pc-Dragon**, and **H<sub>2</sub>Pc-Frog** measured at the corresponding emission band maxima and excited at 375 nm. IRF is the instrument response function.



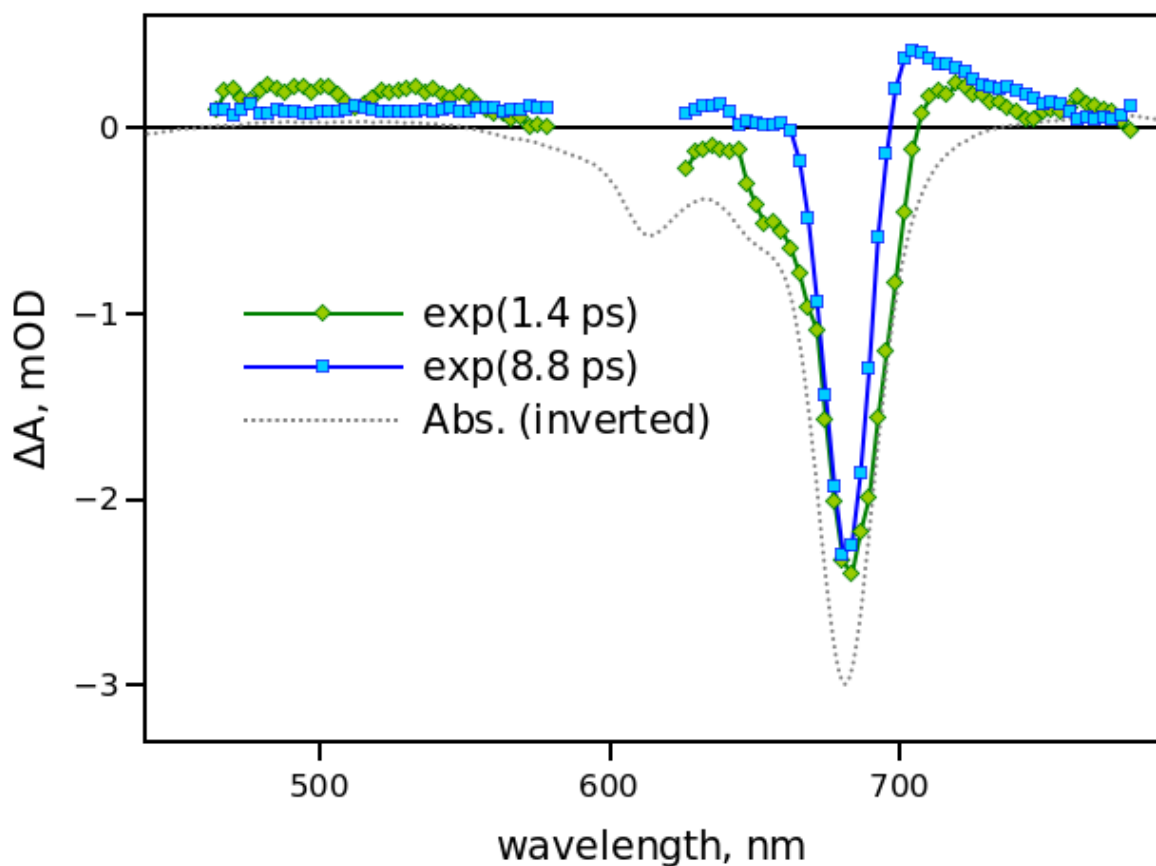

**Fig. S15.** DAS of **CoPc-Windmill** in toluene. The associated time constants are shown in the plot. The gray dotted line shows absorption spectrum inverted and scaled for comparison.

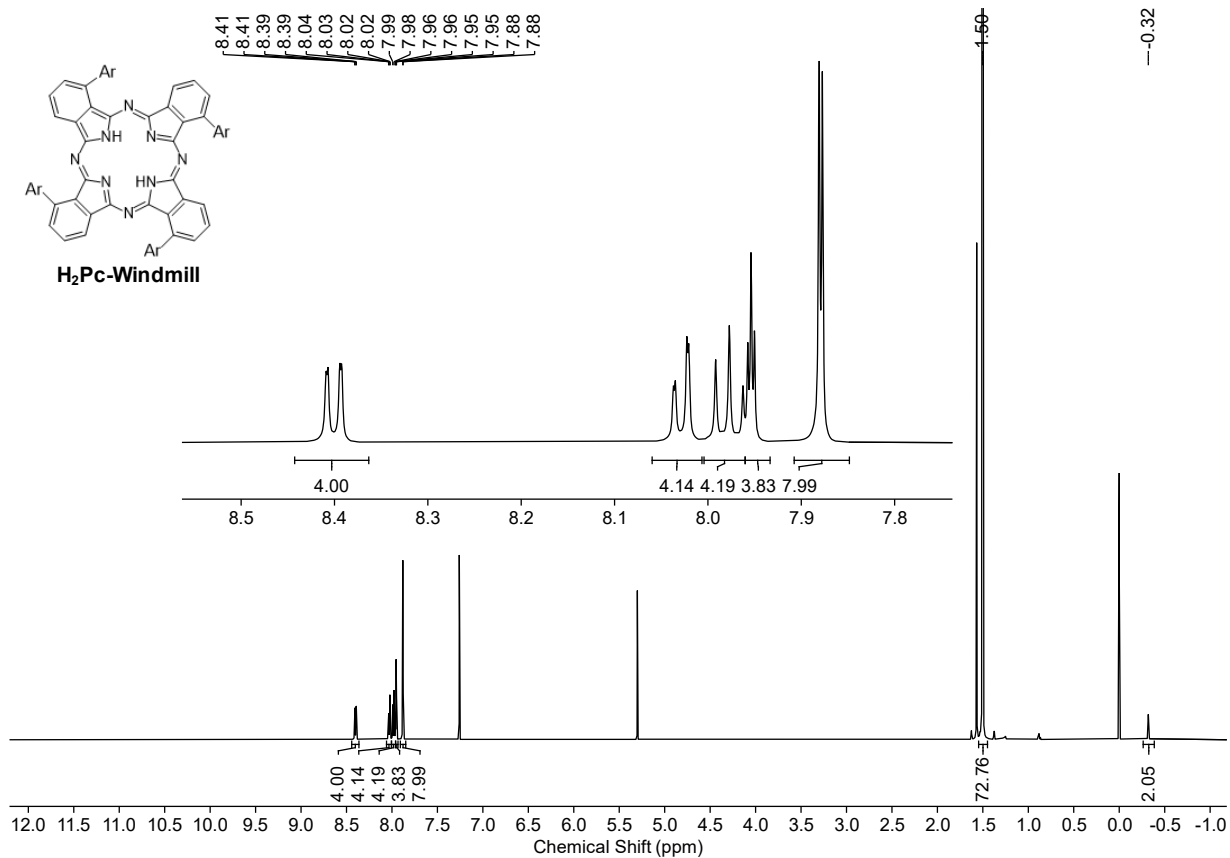

**Fig. S16.** <sup>1</sup>H NMR spectrum (500 MHz, CDCl<sub>3</sub>) of H<sub>2</sub>Pc-Windmill.

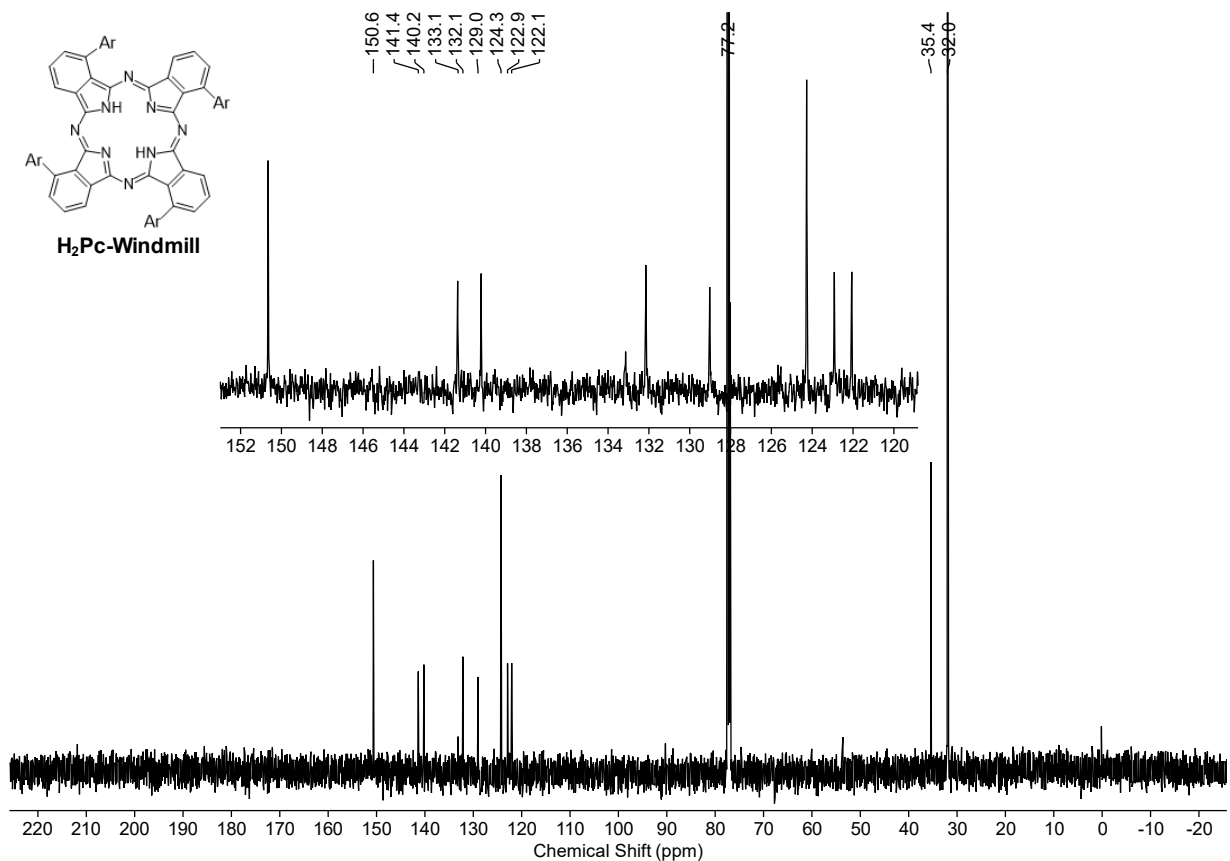

**Fig. S17.** <sup>13</sup>C{<sup>1</sup>H} NMR spectrum (126 MHz, CDCl<sub>3</sub>) of H<sub>2</sub>Pc-Windmill.

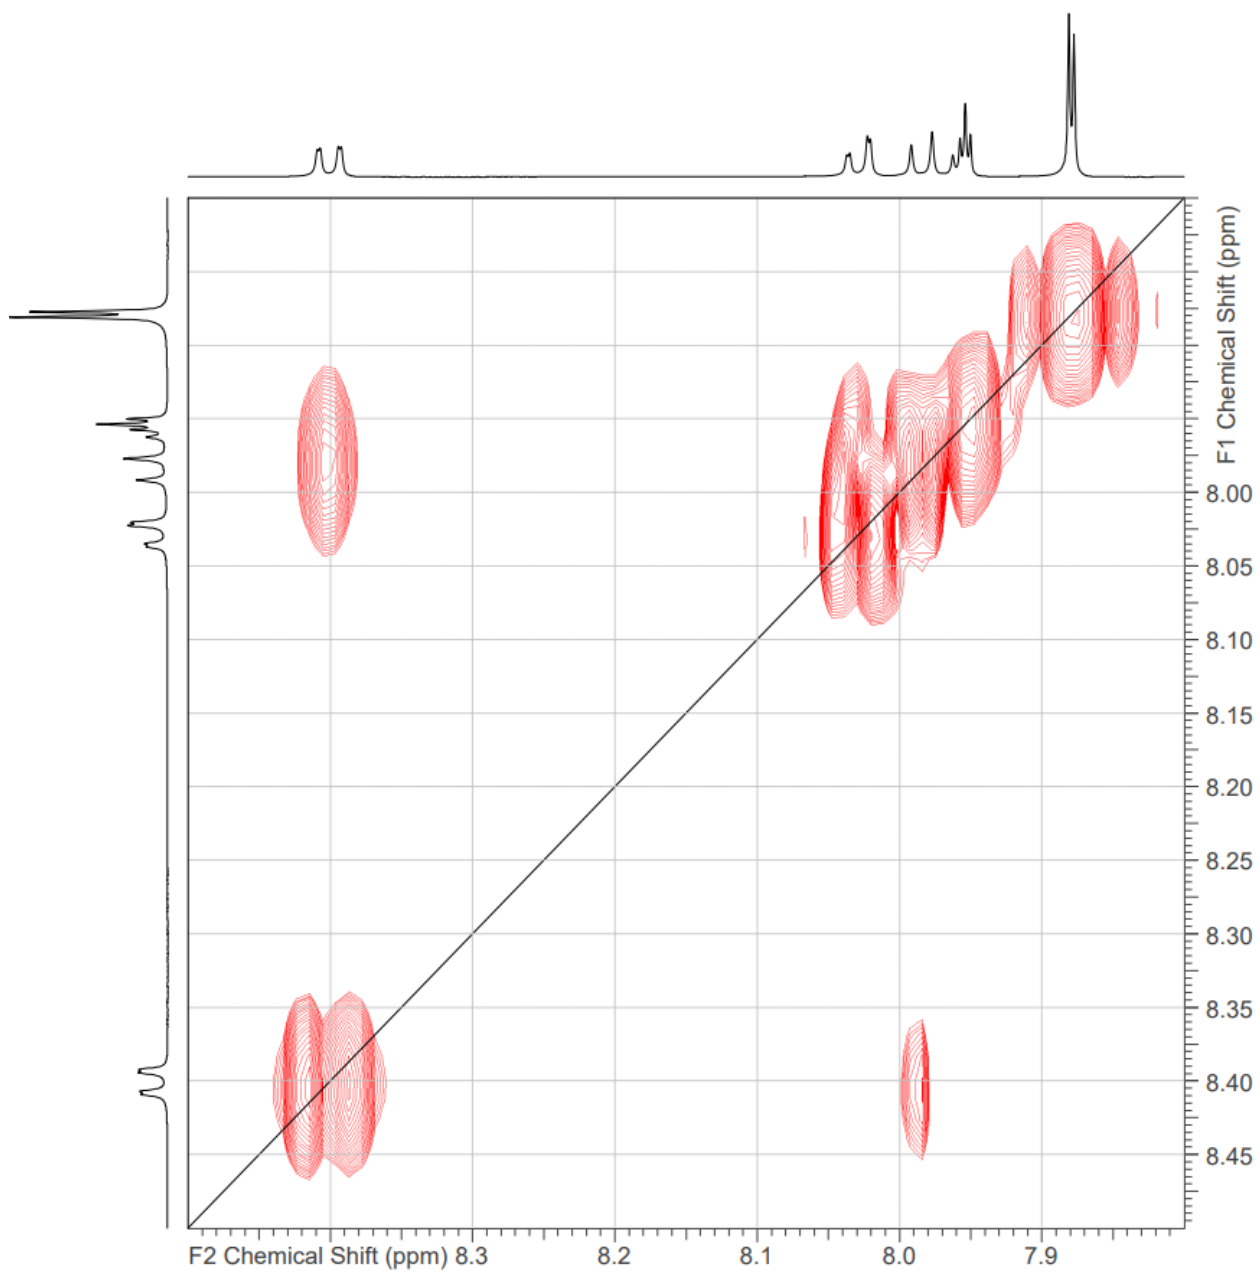

**Fig. S18.**  $^1\text{H}$ - $^1\text{H}$  COSY NMR spectrum (500 MHz,  $\text{CDCl}_3$ ) of  $\text{H}_2\text{Pc-Windmill}$ .

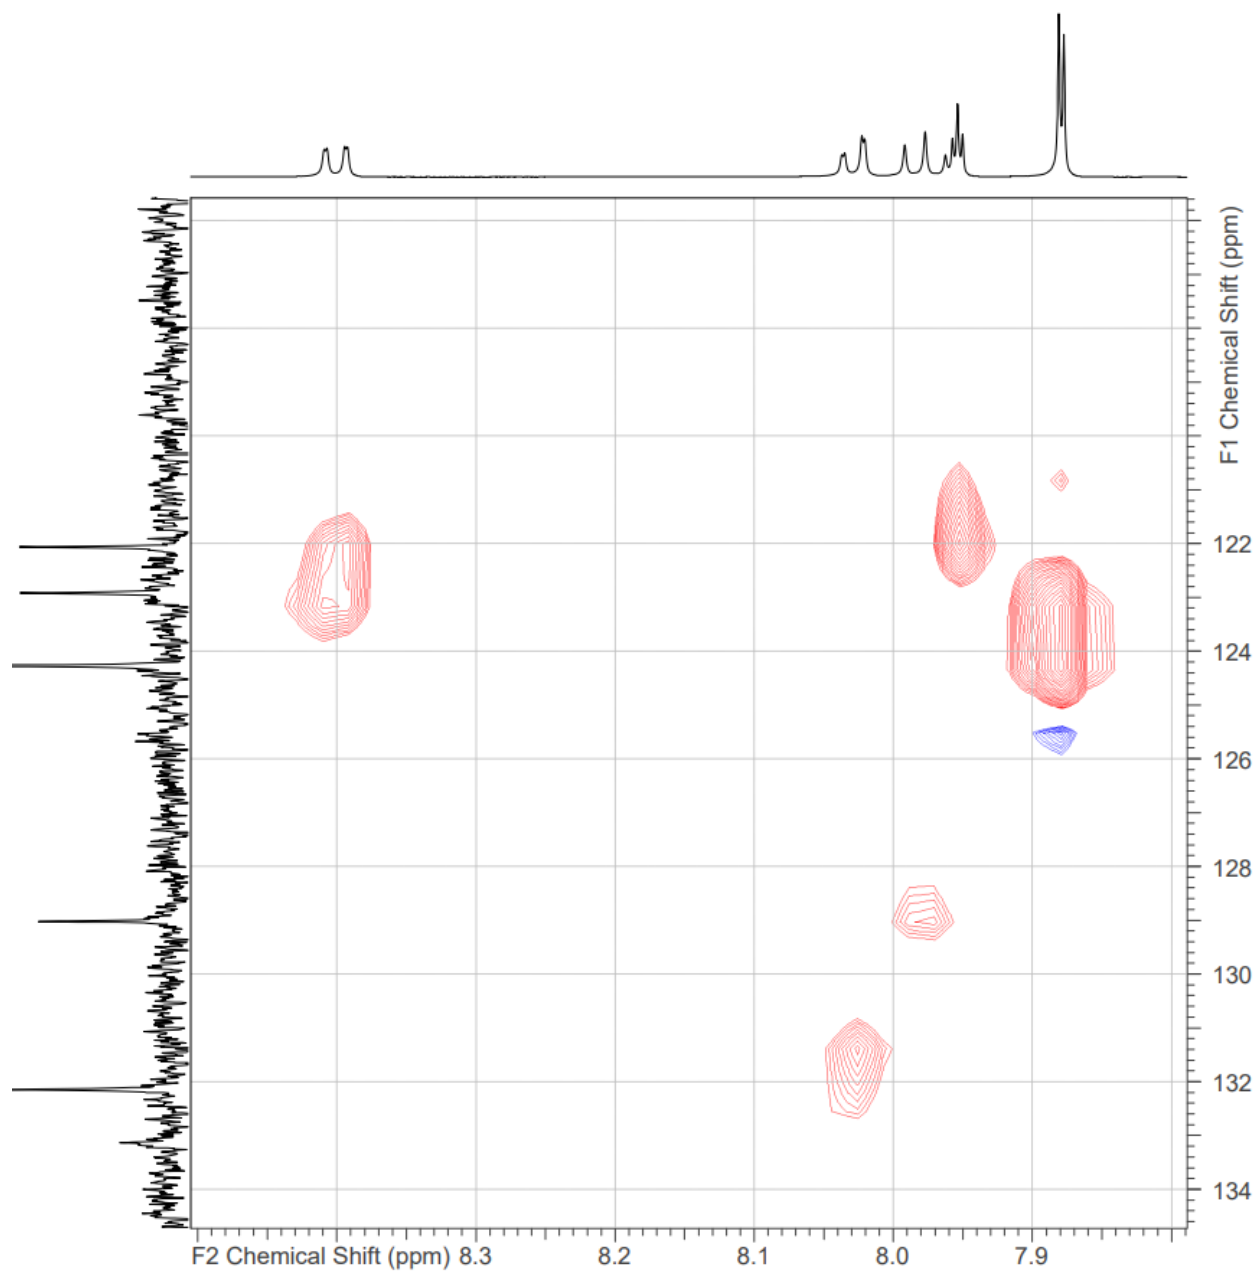

**Fig. S19.**  $^1\text{H}$ - $^{13}\text{C}$  HSQC NMR spectrum (500 MHz,  $\text{CDCl}_3$ ) of  $\text{H}_2\text{Pc-Windmill}$ .

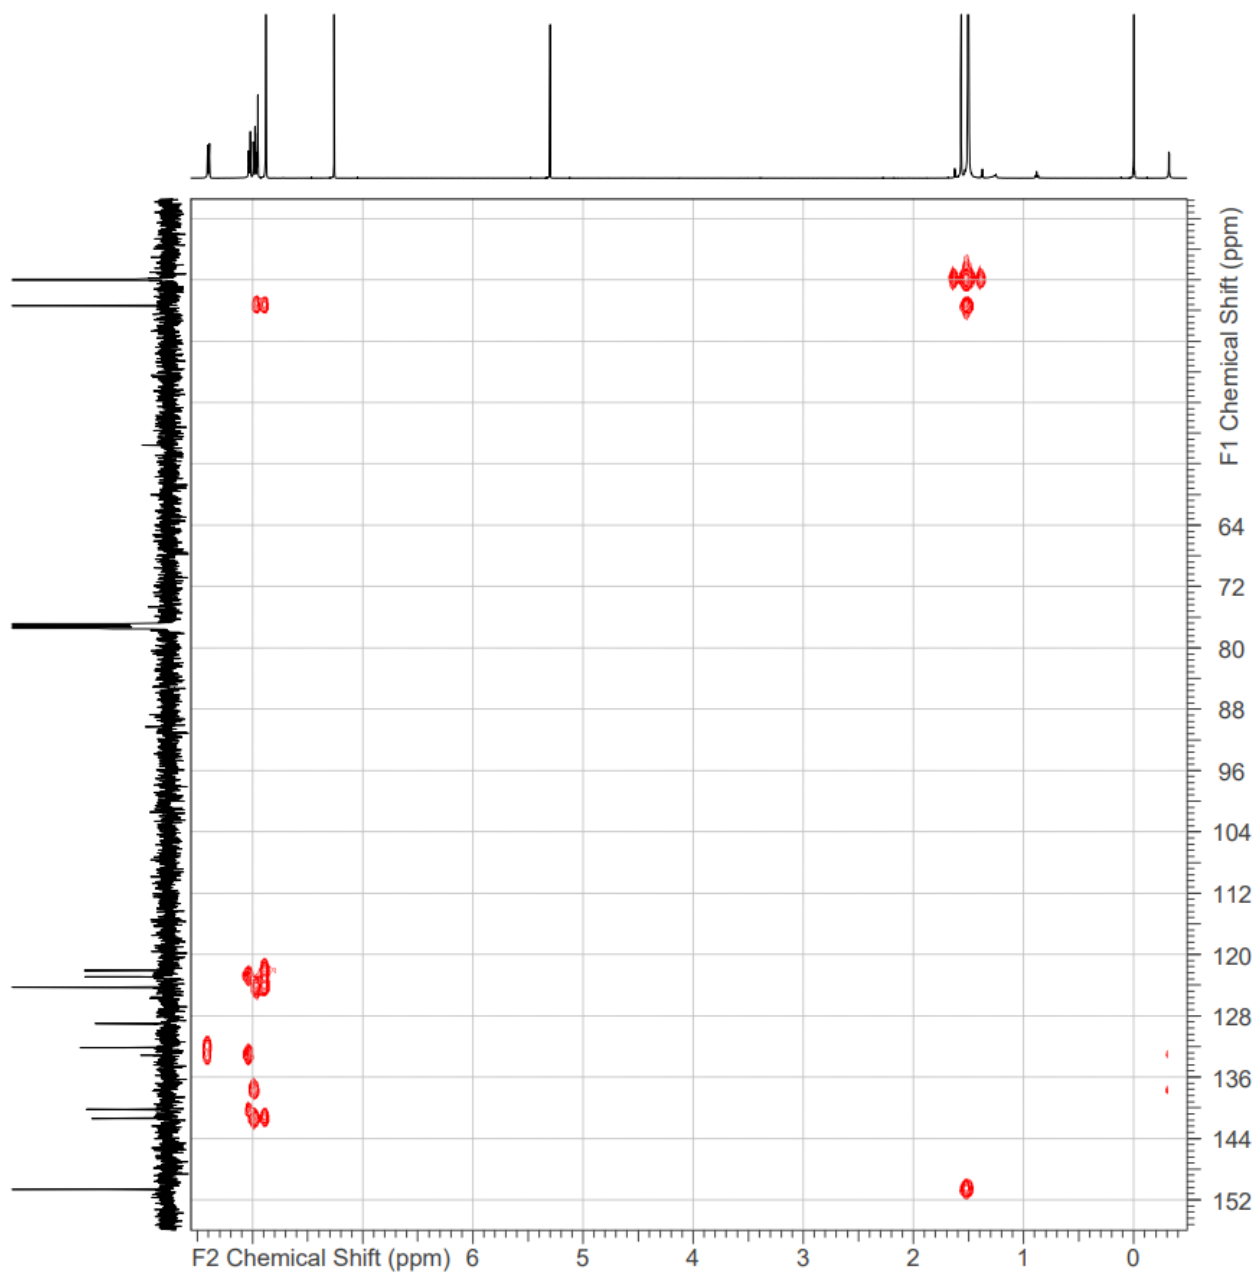

**Fig. S20.**  $^1\text{H}$ - $^{13}\text{C}$  HMBC NMR spectrum (500 MHz,  $\text{CDCl}_3$ ) of **H<sub>2</sub>Pc-Windmill**.

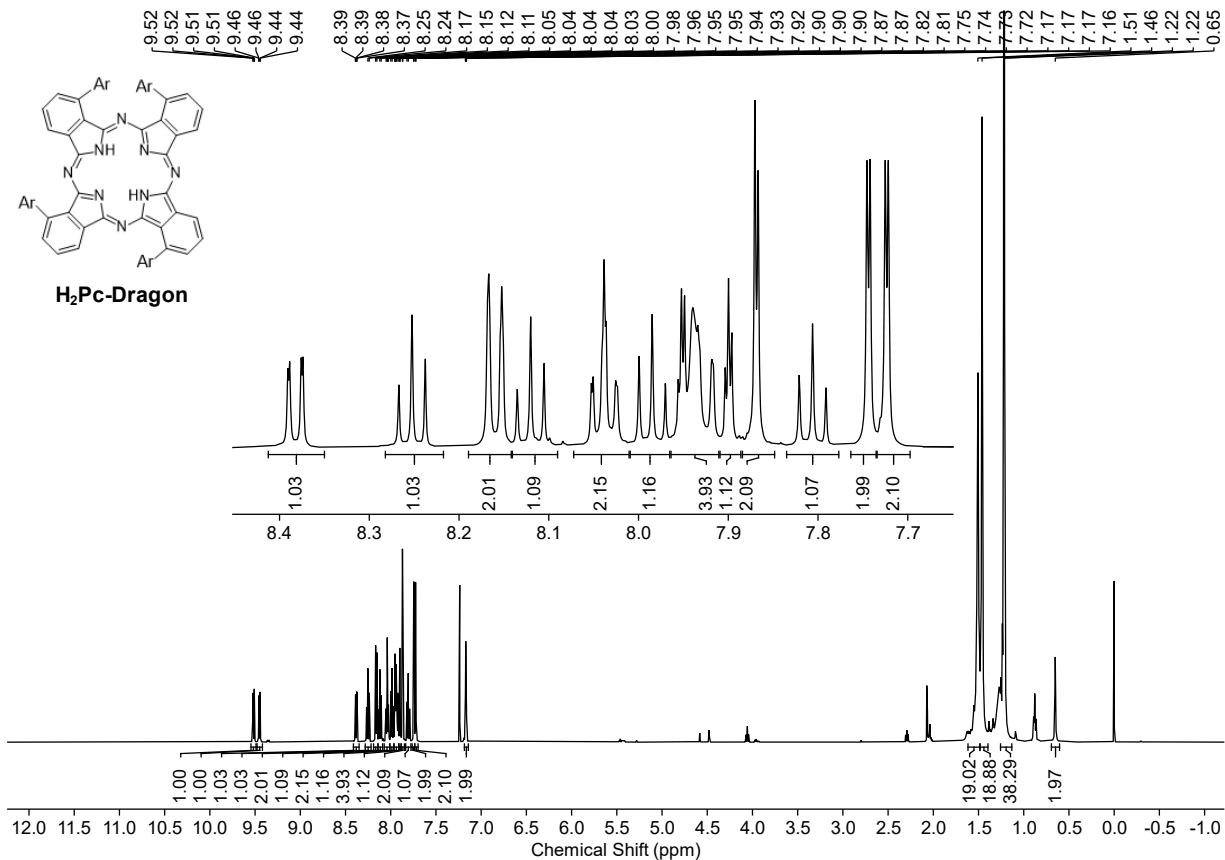

**Fig. S21.** <sup>1</sup>H NMR spectrum (500 MHz, CDCl<sub>3</sub>) of H<sub>2</sub>Pc-Dragon.

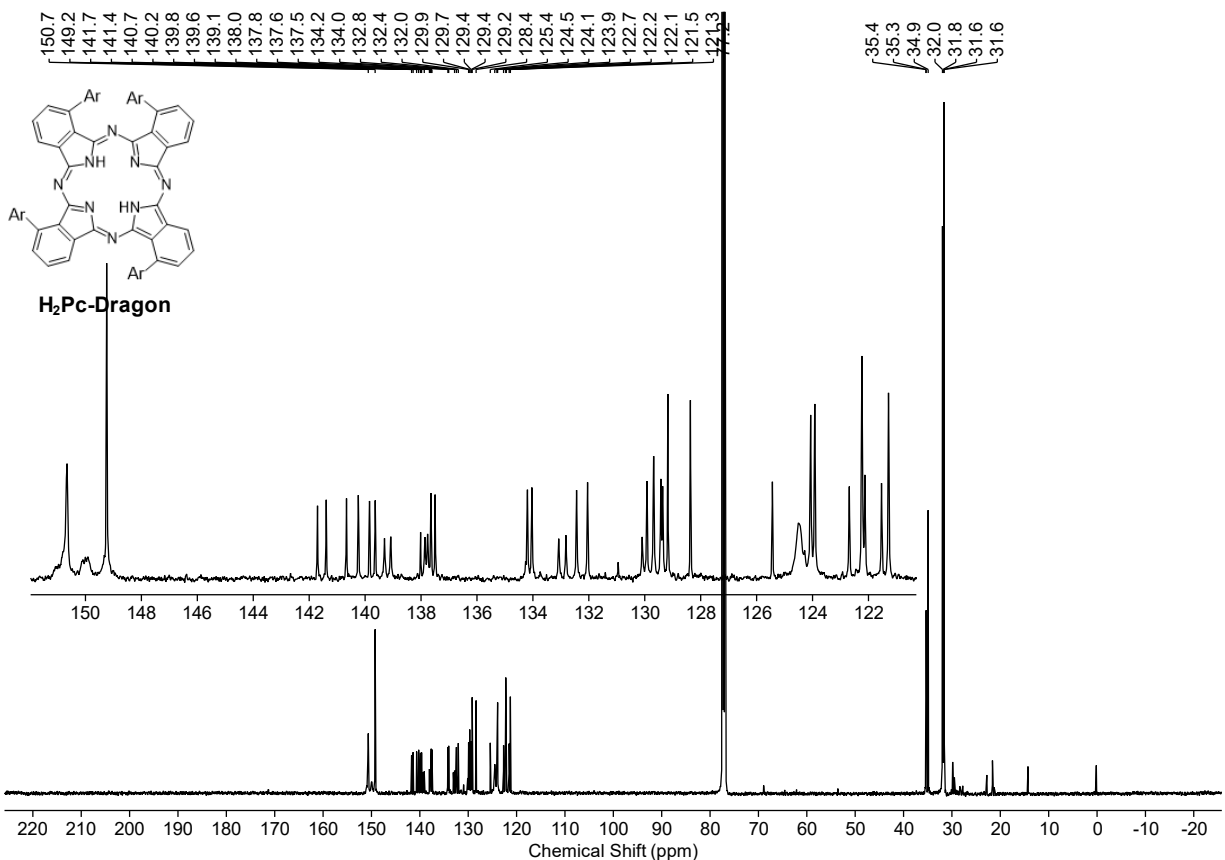

**Fig. S22.** <sup>13</sup>C{<sup>1</sup>H} NMR spectrum (126 MHz, CDCl<sub>3</sub>) of H<sub>2</sub>Pc-Dragon.

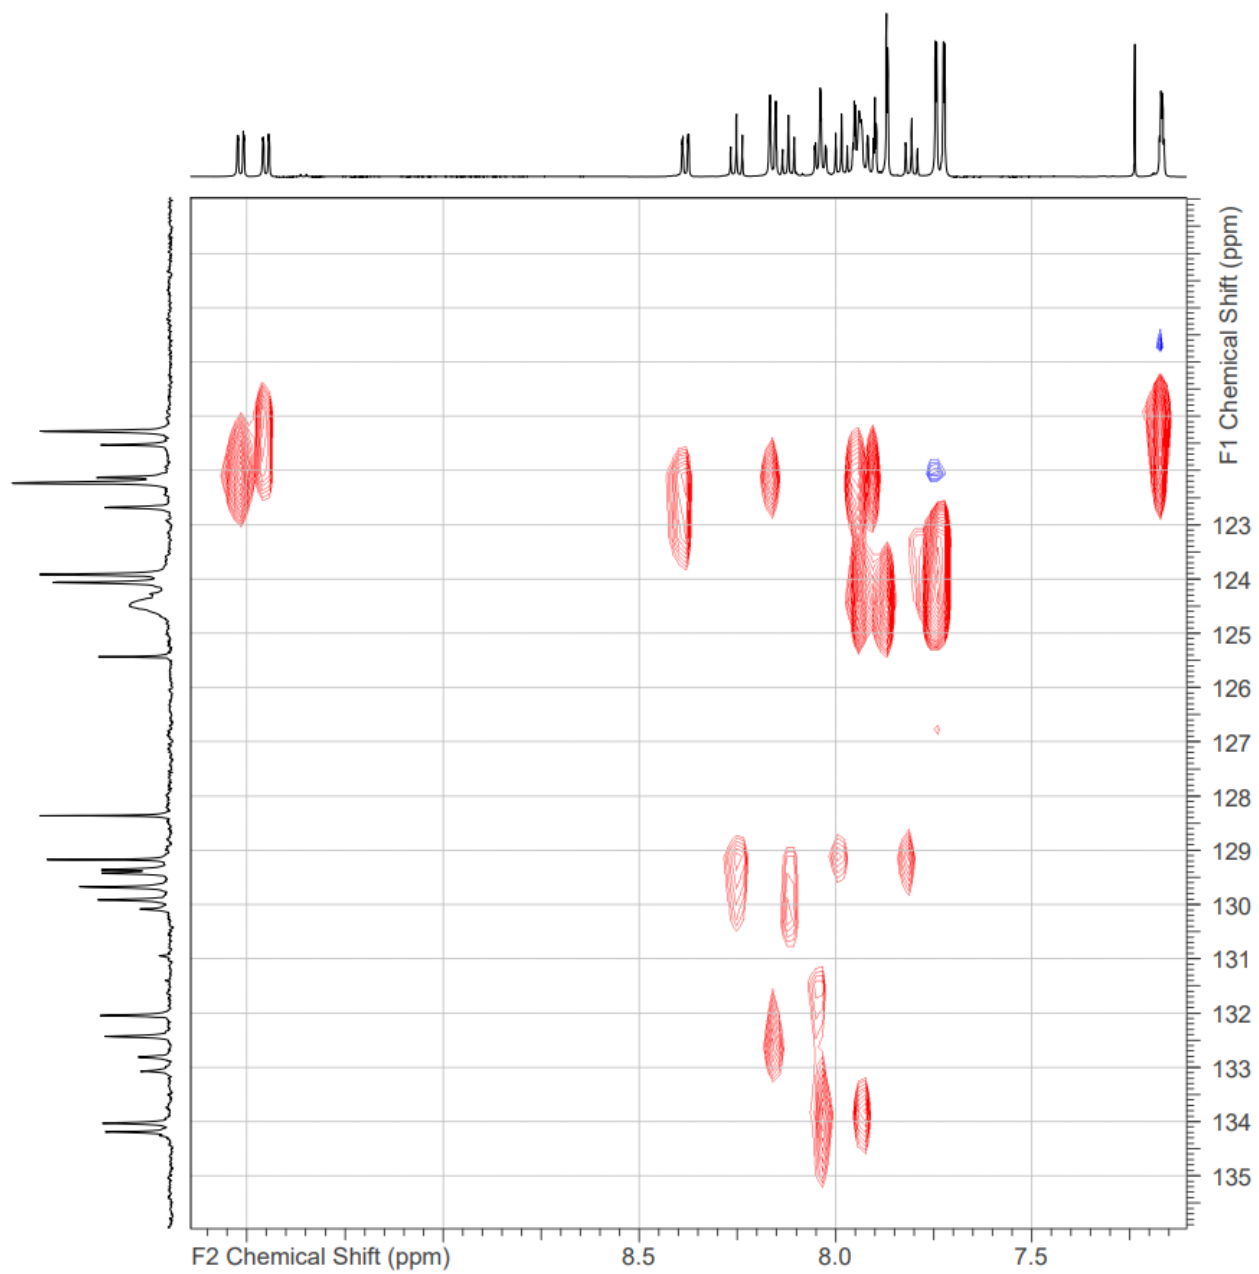

**Fig. S23.**  $^1\text{H}$ - $^{13}\text{C}$  HSQC NMR spectrum (500 MHz,  $\text{CDCl}_3$ ) of **H<sub>2</sub>Pc-Dragon**.

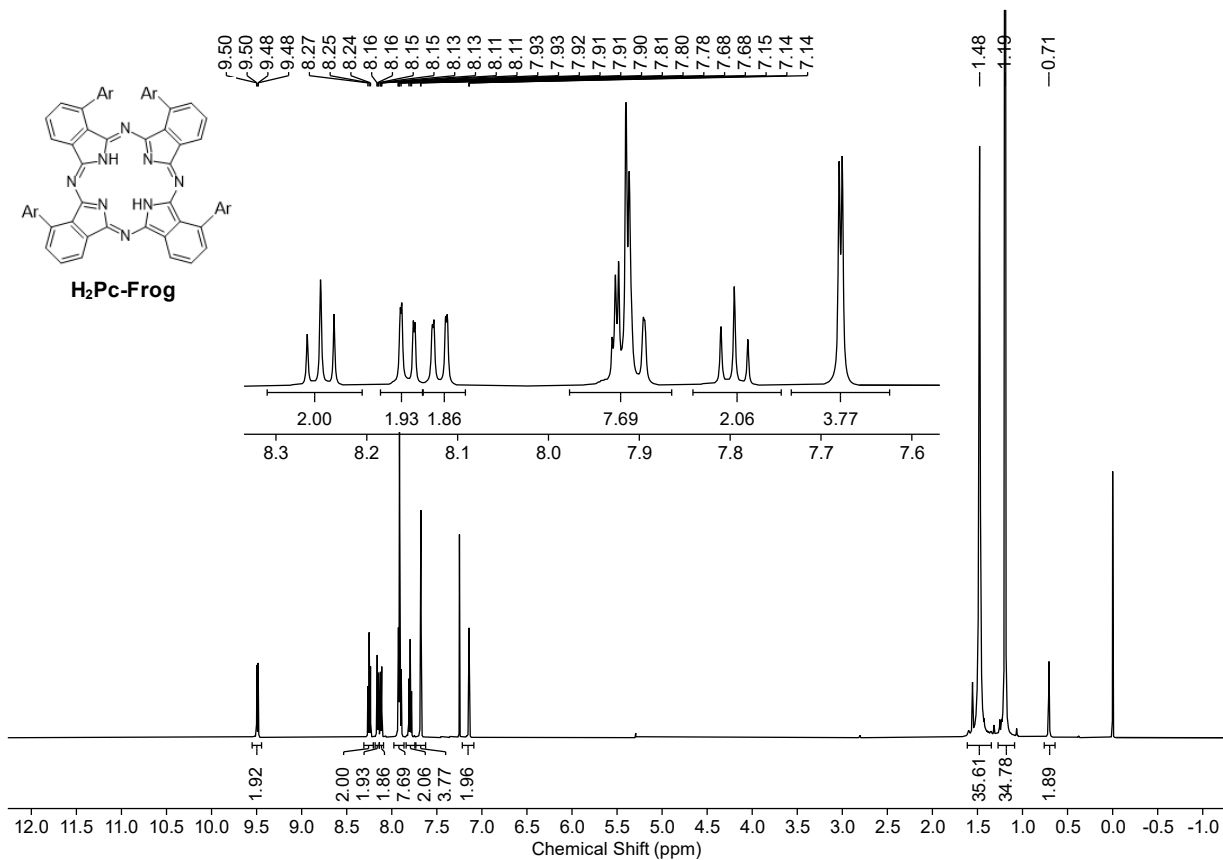

**Fig. S24.**  $^1\text{H}$  NMR spectrum (500 MHz,  $\text{CDCl}_3$ ) of  $\text{H}_2\text{Pc-Frog}$ .

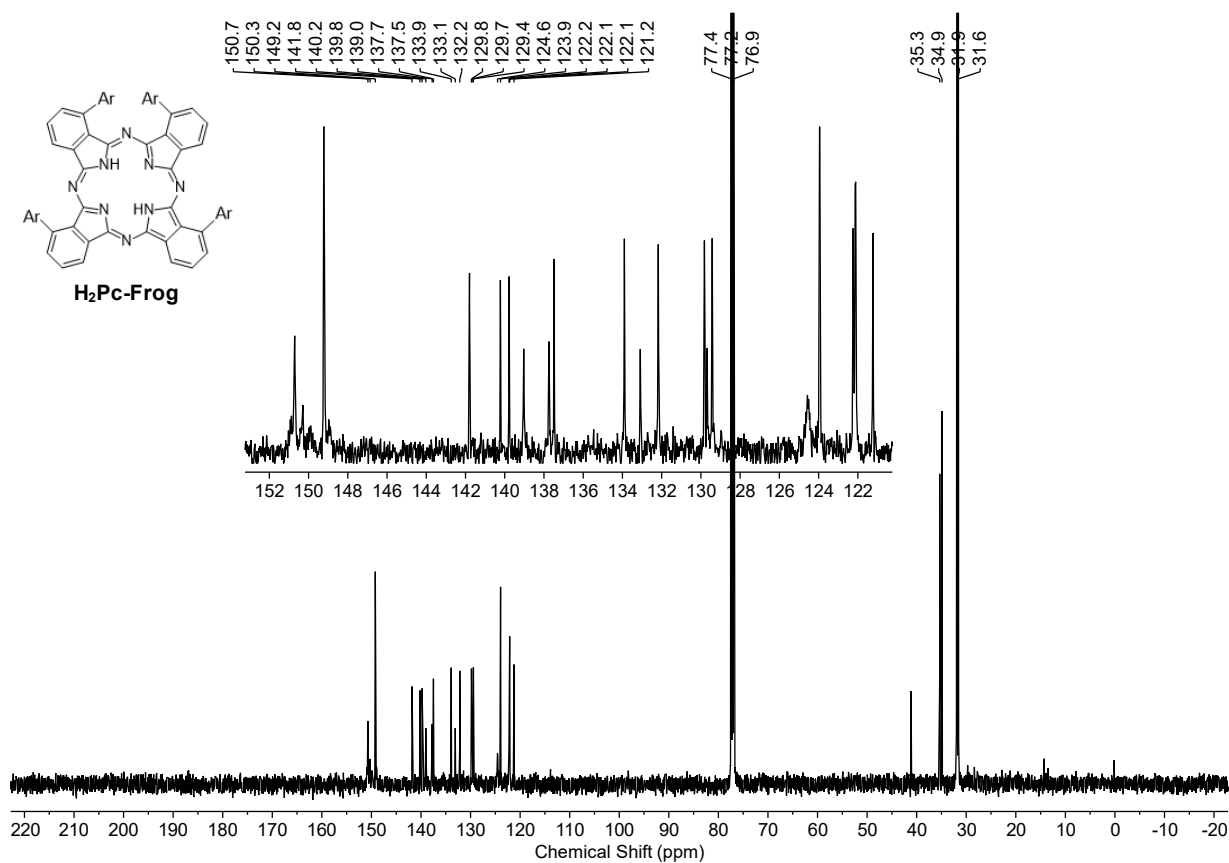

**Fig. S25.**  $^{13}\text{C}\{^1\text{H}\}$  NMR spectrum (126 MHz,  $\text{CDCl}_3$ ) of  $\text{H}_2\text{Pc-Frog}$ .



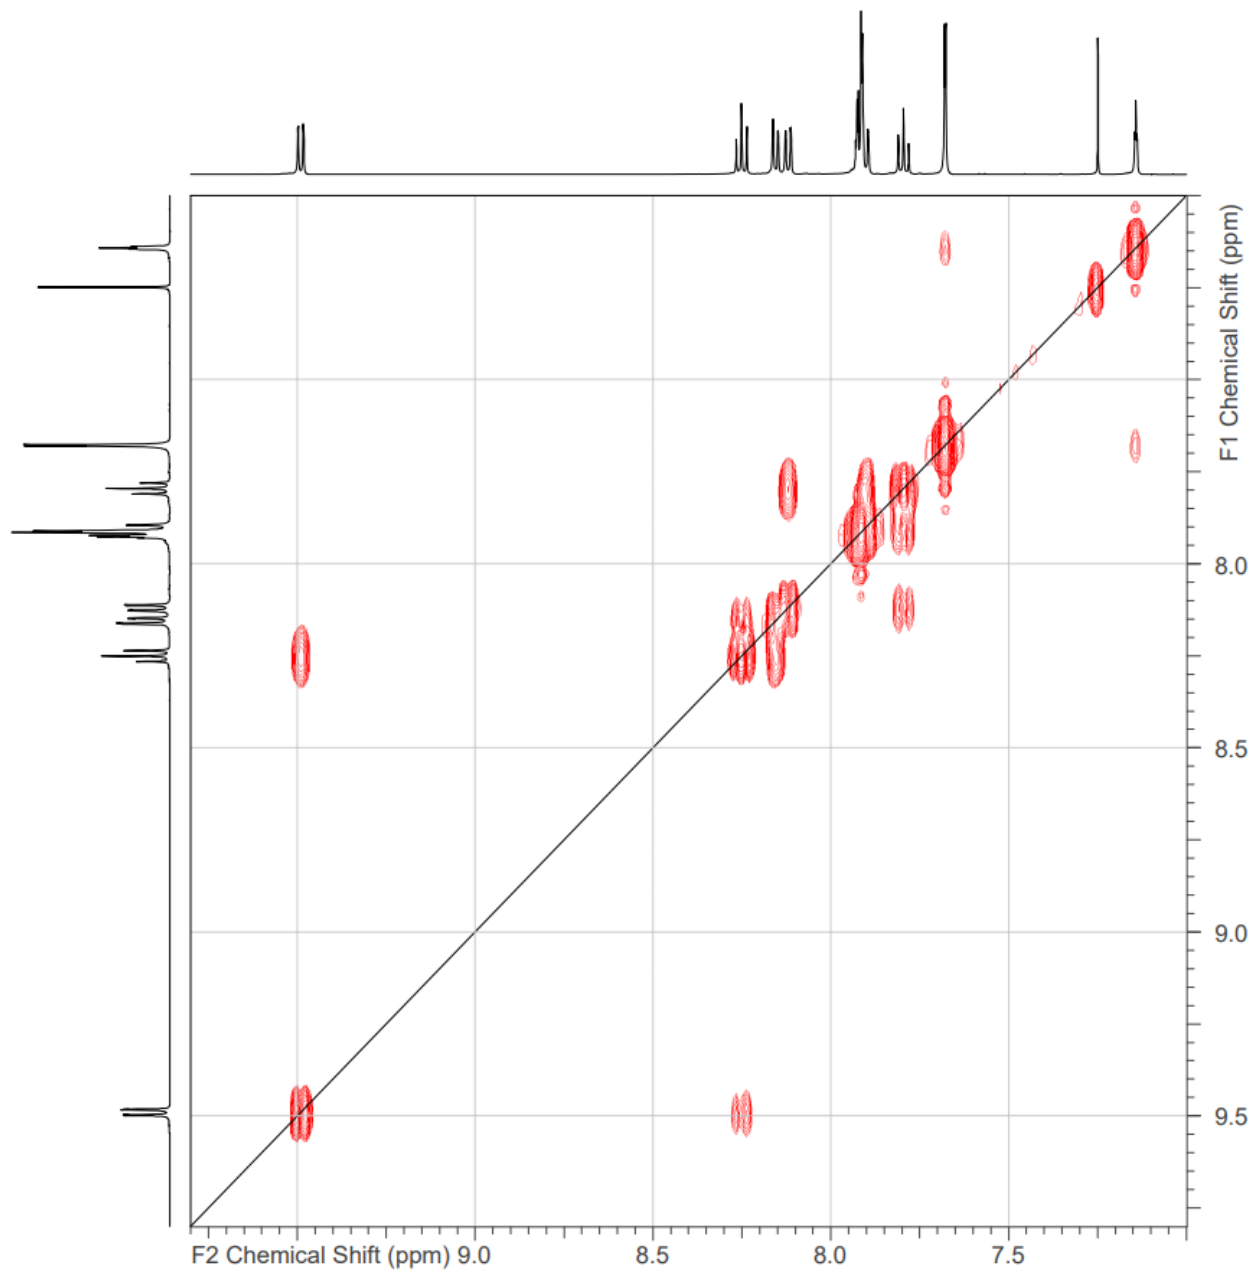

**Fig. S26.**  $^1\text{H}$ - $^1\text{H}$  COSY NMR spectrum (500 MHz,  $\text{CDCl}_3$ ) of  $\text{H}_2\text{Pc-Frog}$ .

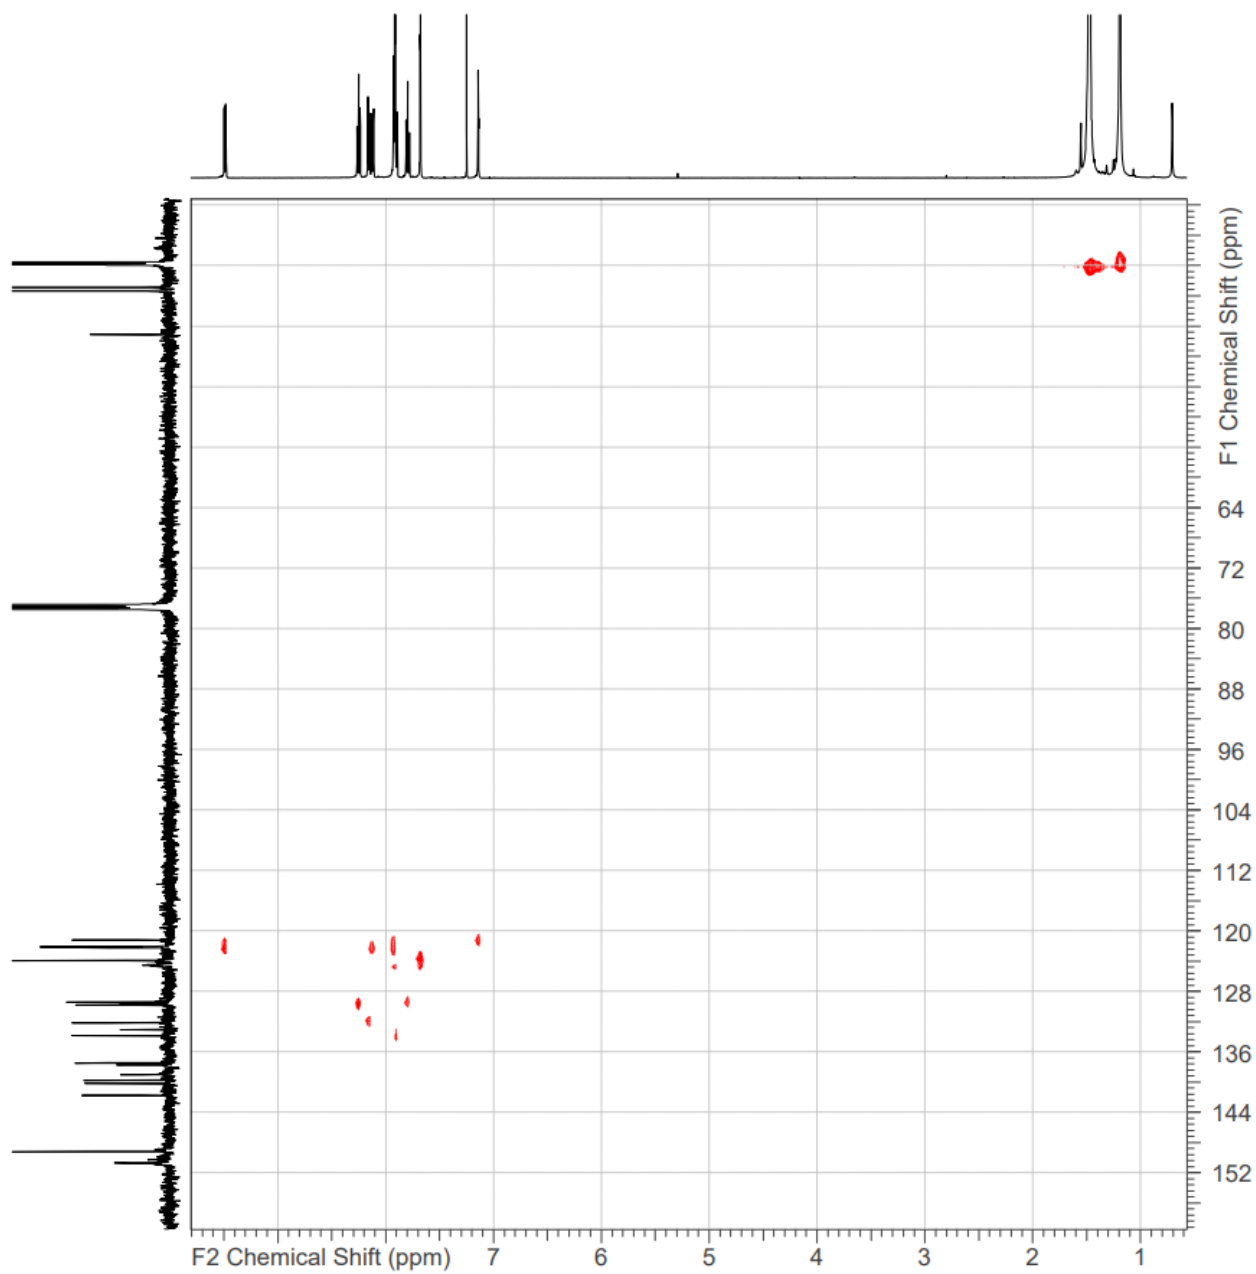

**Fig. S27.**  $^1\text{H}$ - $^{13}\text{C}$  HSQC NMR spectrum (500 MHz,  $\text{CDCl}_3$ ) of  **$\text{H}_2\text{Pc-Frog}$** .

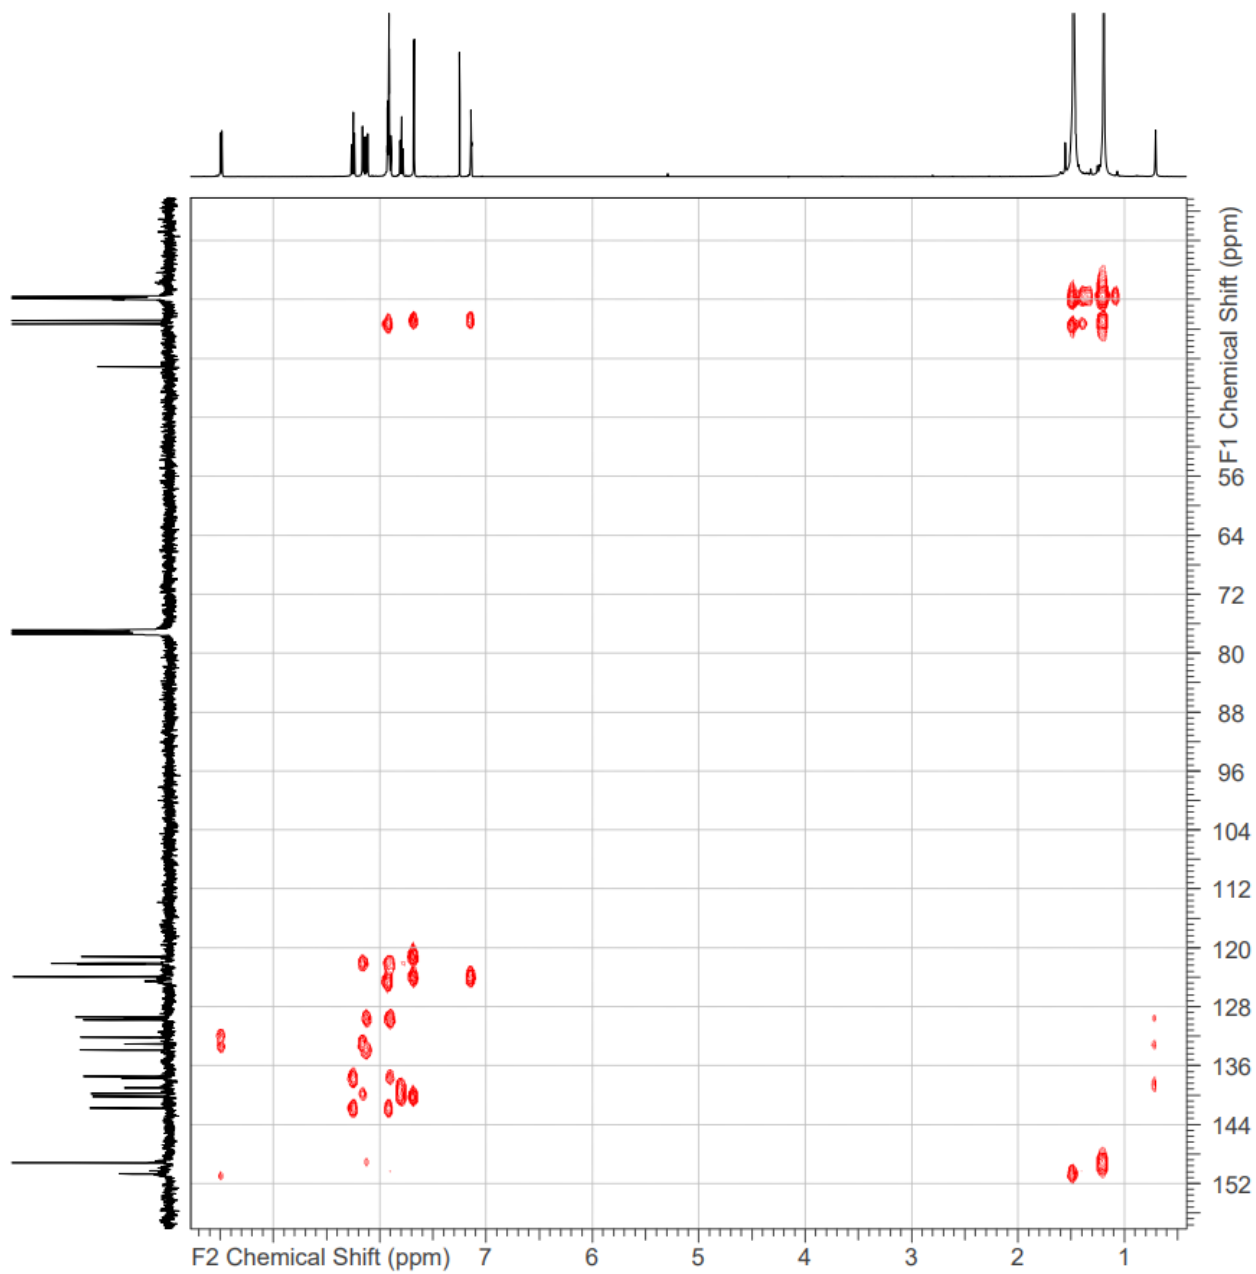

**Fig. S28.**  $^1\text{H}$ - $^{13}\text{C}$  HMBC NMR spectrum (500 MHz,  $\text{CDCl}_3$ ) of **H<sub>2</sub>Pc-Frog**.

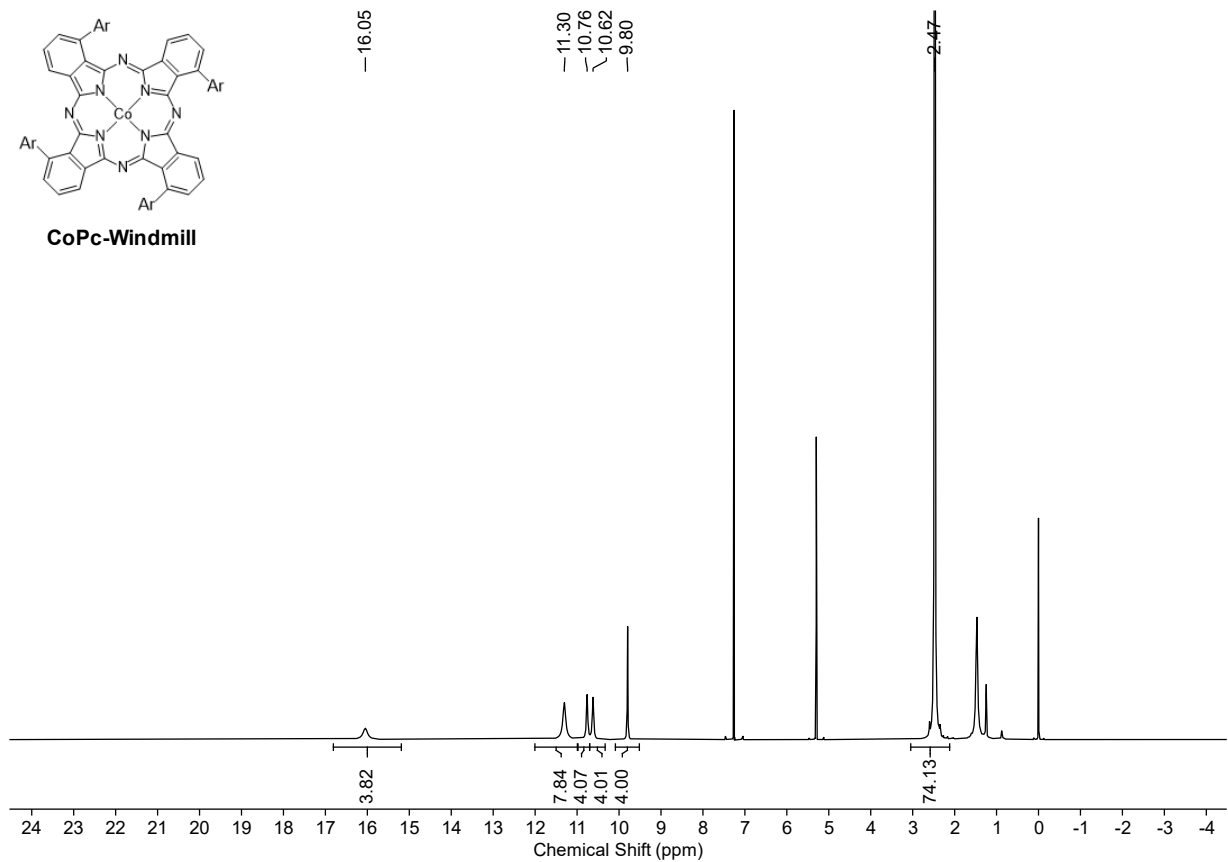

**Fig. S29.** <sup>1</sup>H NMR spectrum (500 MHz, CDCl<sub>3</sub>) of CoPc-Windmill.

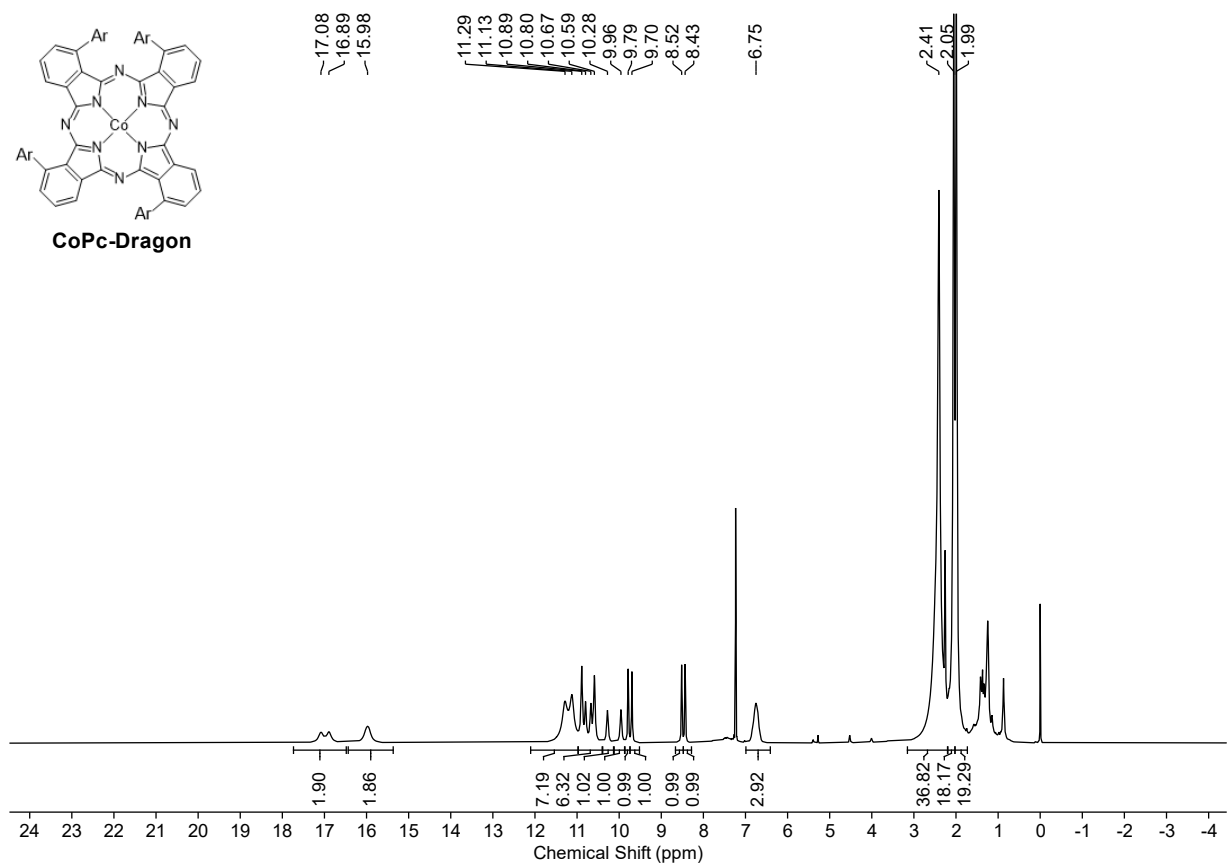

**Fig. S30.** <sup>1</sup>H NMR spectrum (500 MHz, CDCl<sub>3</sub>) of CoPc-Dragon.

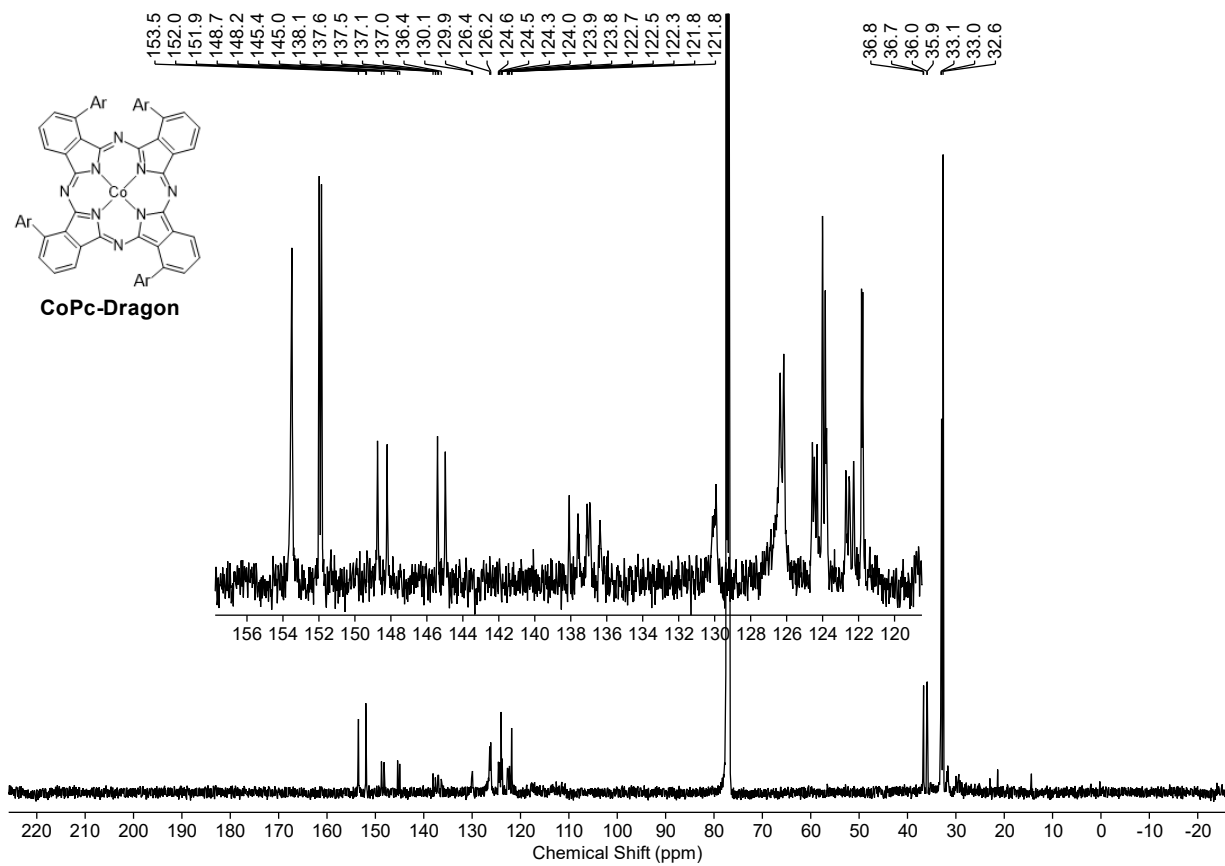

**Fig. S31.**  $^{13}\text{C}\{^1\text{H}\}$  NMR spectrum (126 MHz,  $\text{CDCl}_3$ ) of **CoPc-Dragon**.

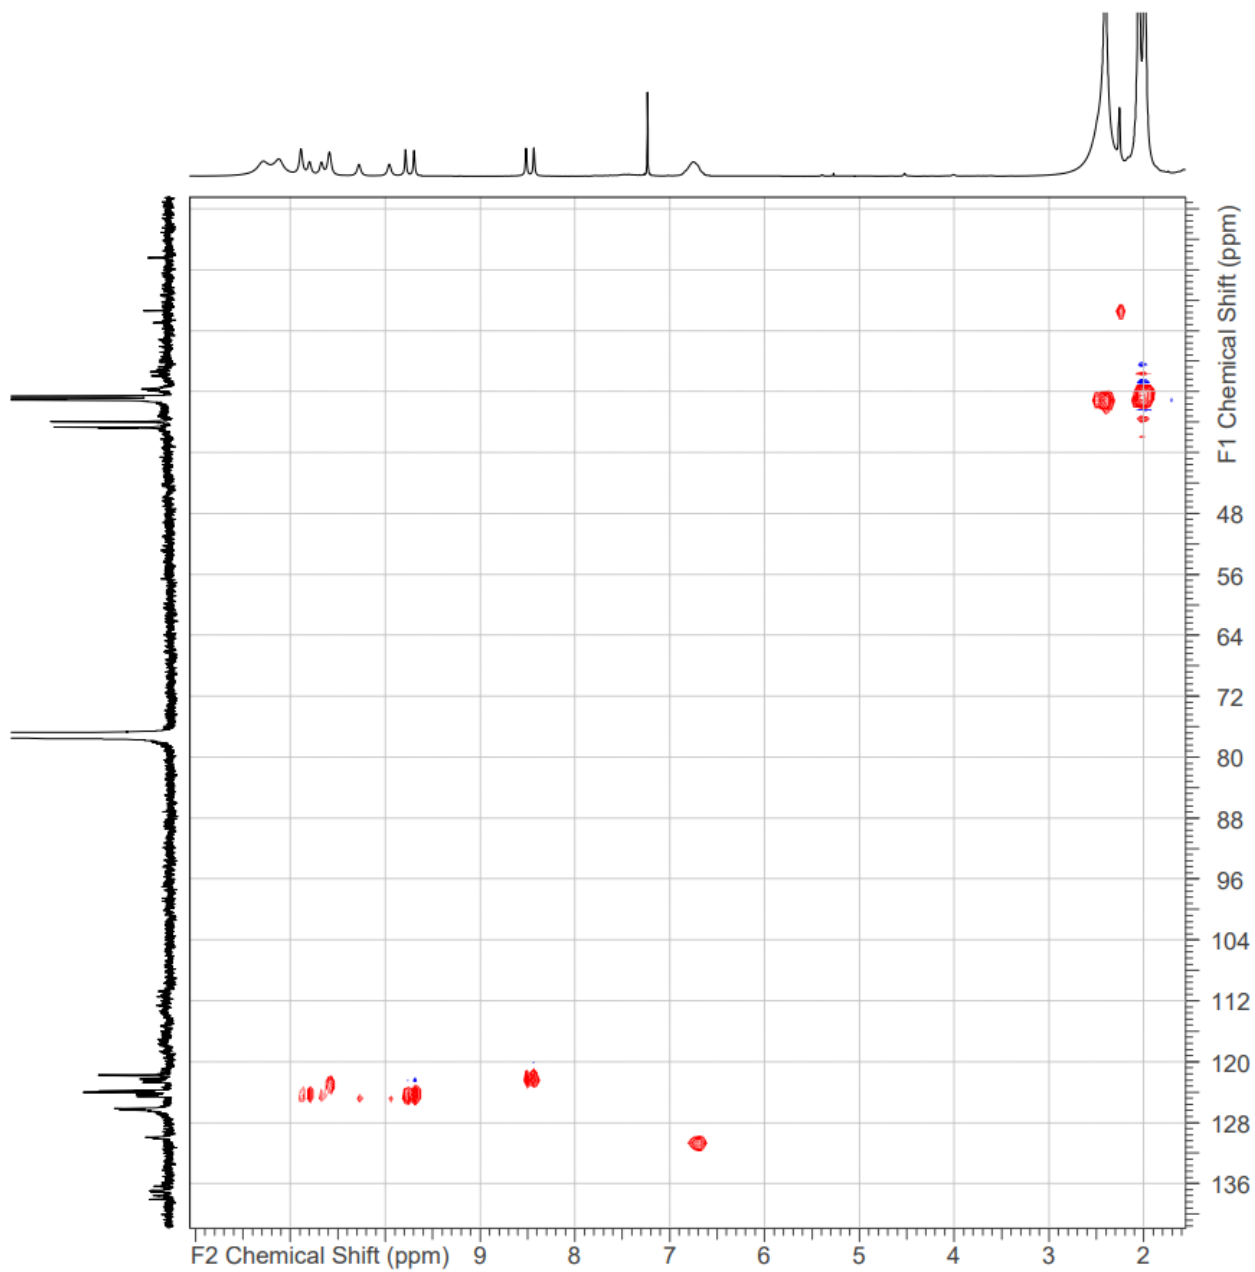

Fig. S32.  $^1\text{H}$ - $^{13}\text{C}$  HSQC NMR spectrum (500 MHz,  $\text{CDCl}_3$ ) of **CoPc-Dragon**.

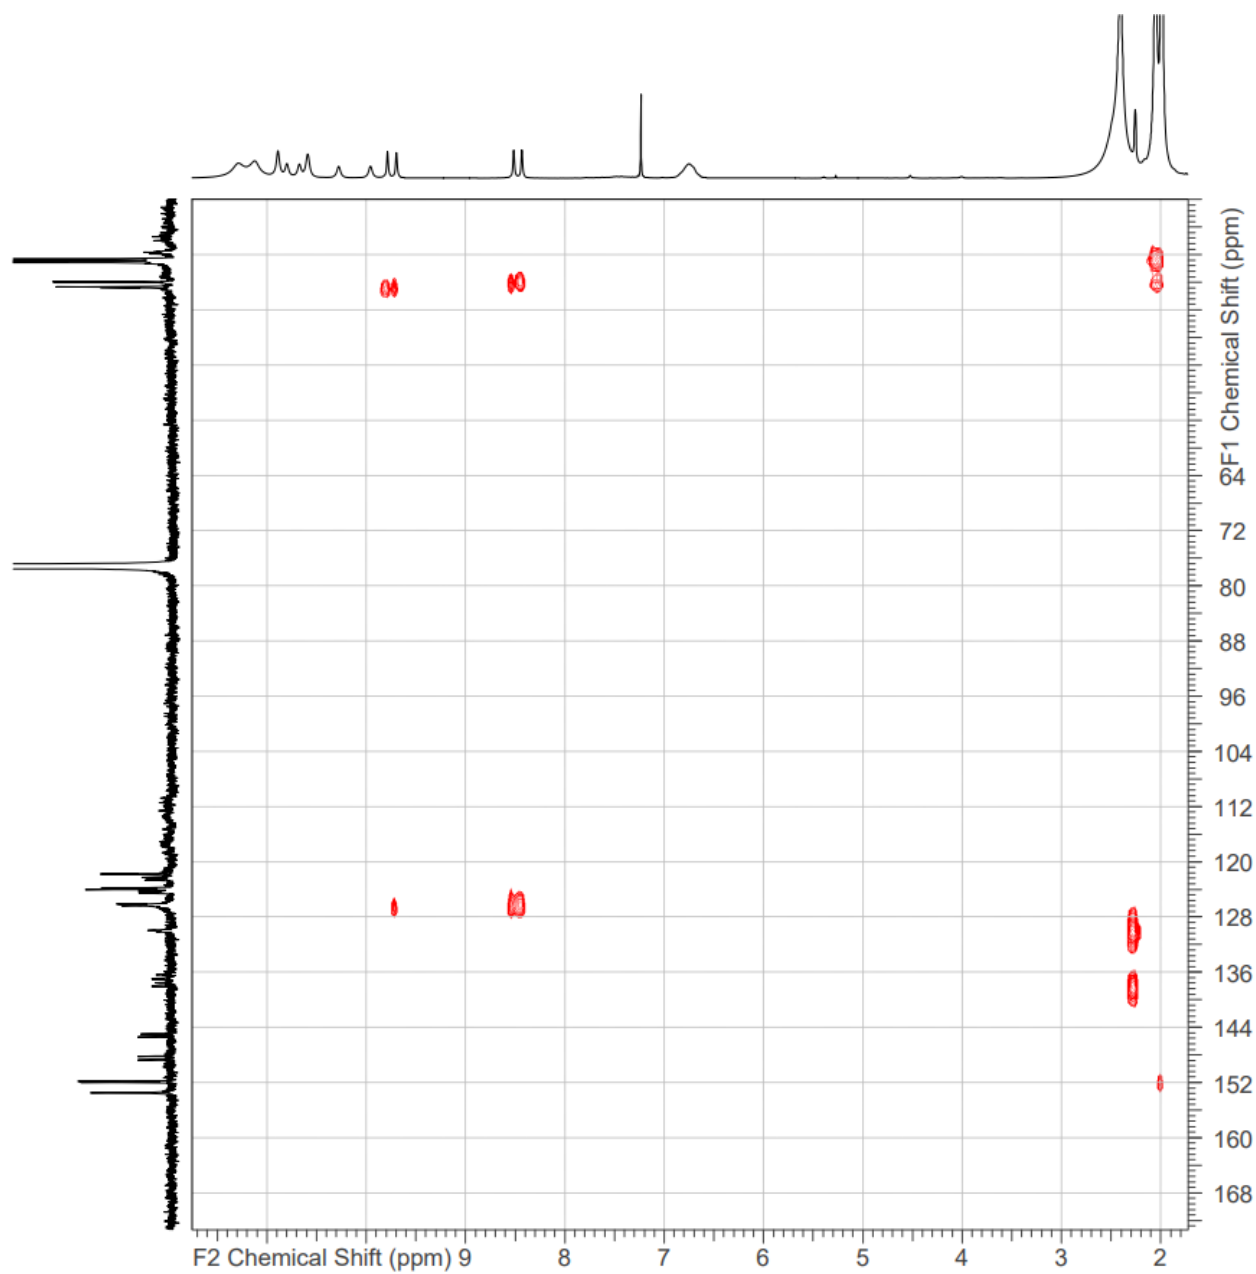

Fig. S33.  $^1\text{H}$ - $^{13}\text{C}$  HMBC NMR spectrum (500 MHz,  $\text{CDCl}_3$ ) of CoPc-Dragon.

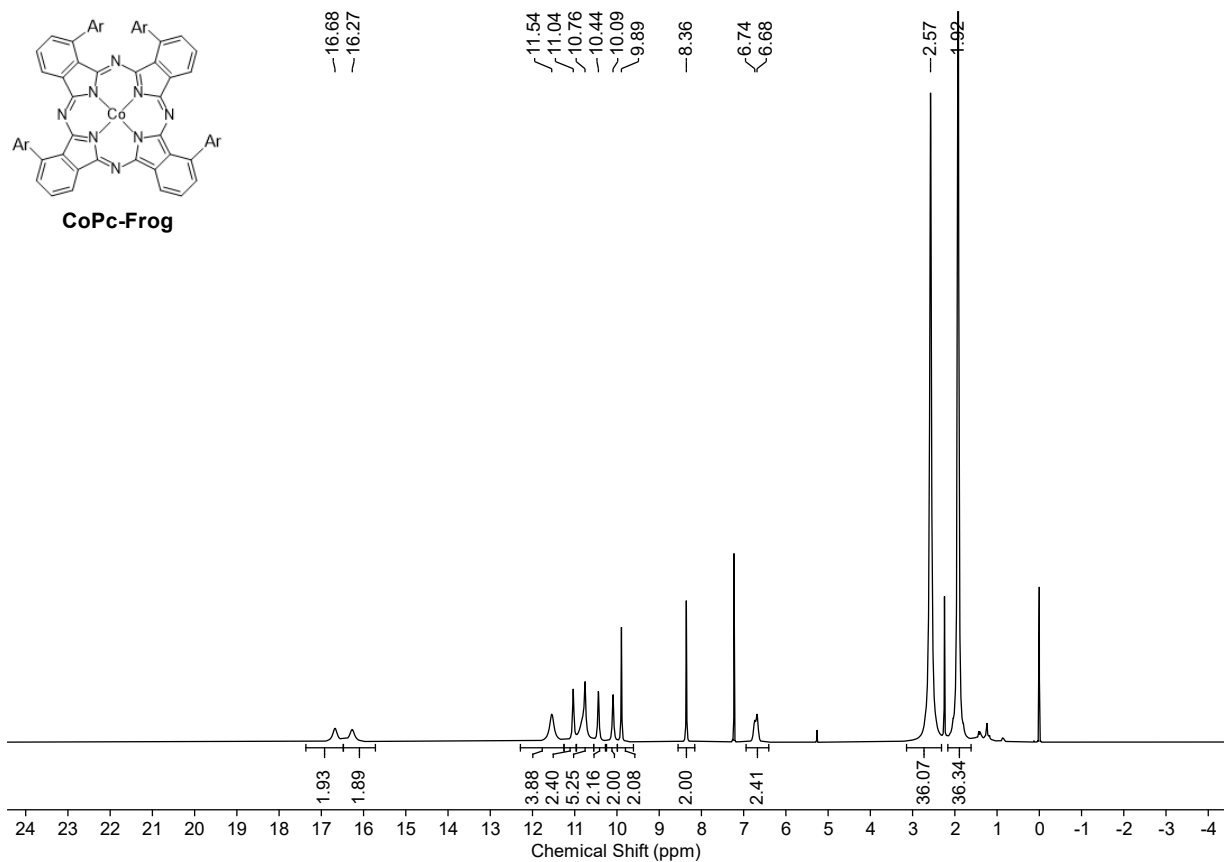

**Fig. S34.**  $^1\text{H}$  NMR spectrum (500 MHz,  $\text{CDCl}_3$ ) of CoPc-Frog.

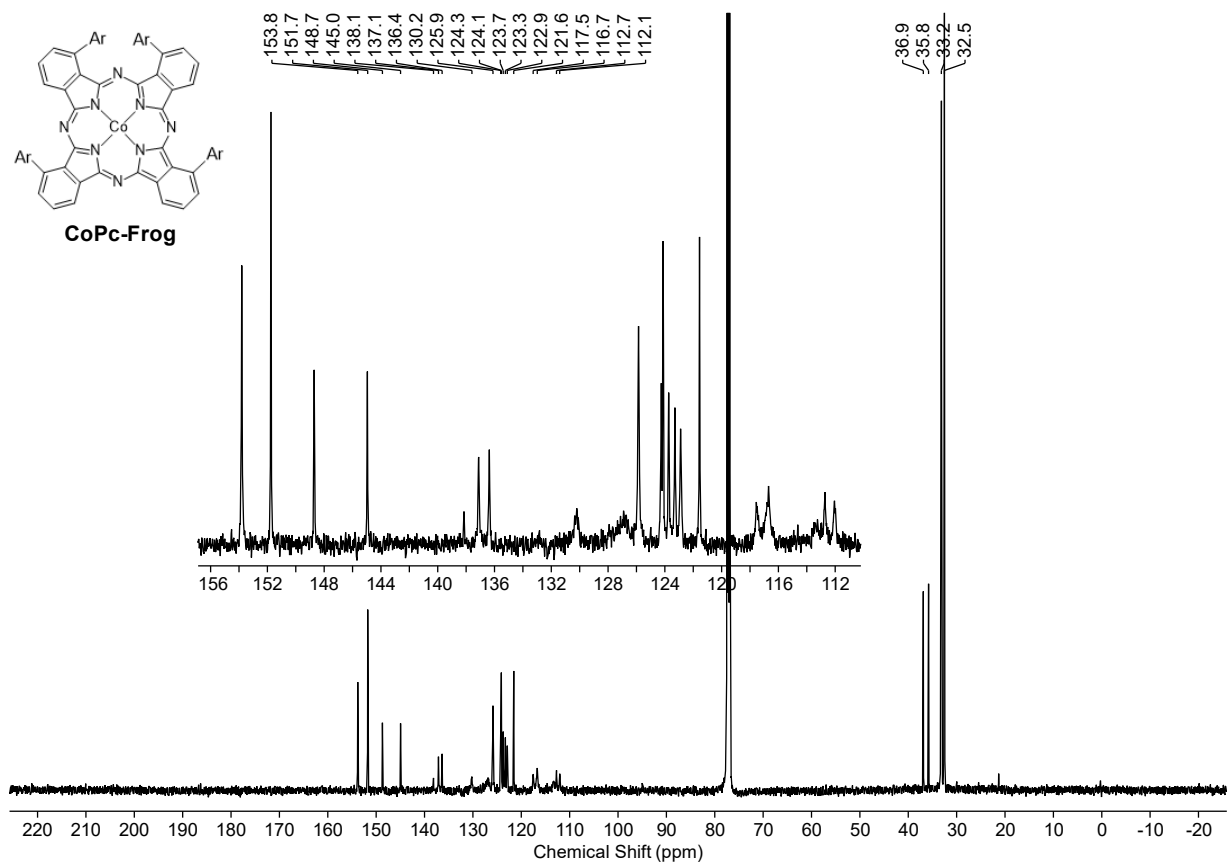

**Fig. S35.**  $^{13}\text{C}\{^1\text{H}\}$  NMR spectrum (126 MHz,  $\text{CDCl}_3$ ) of CoPc-Frog.



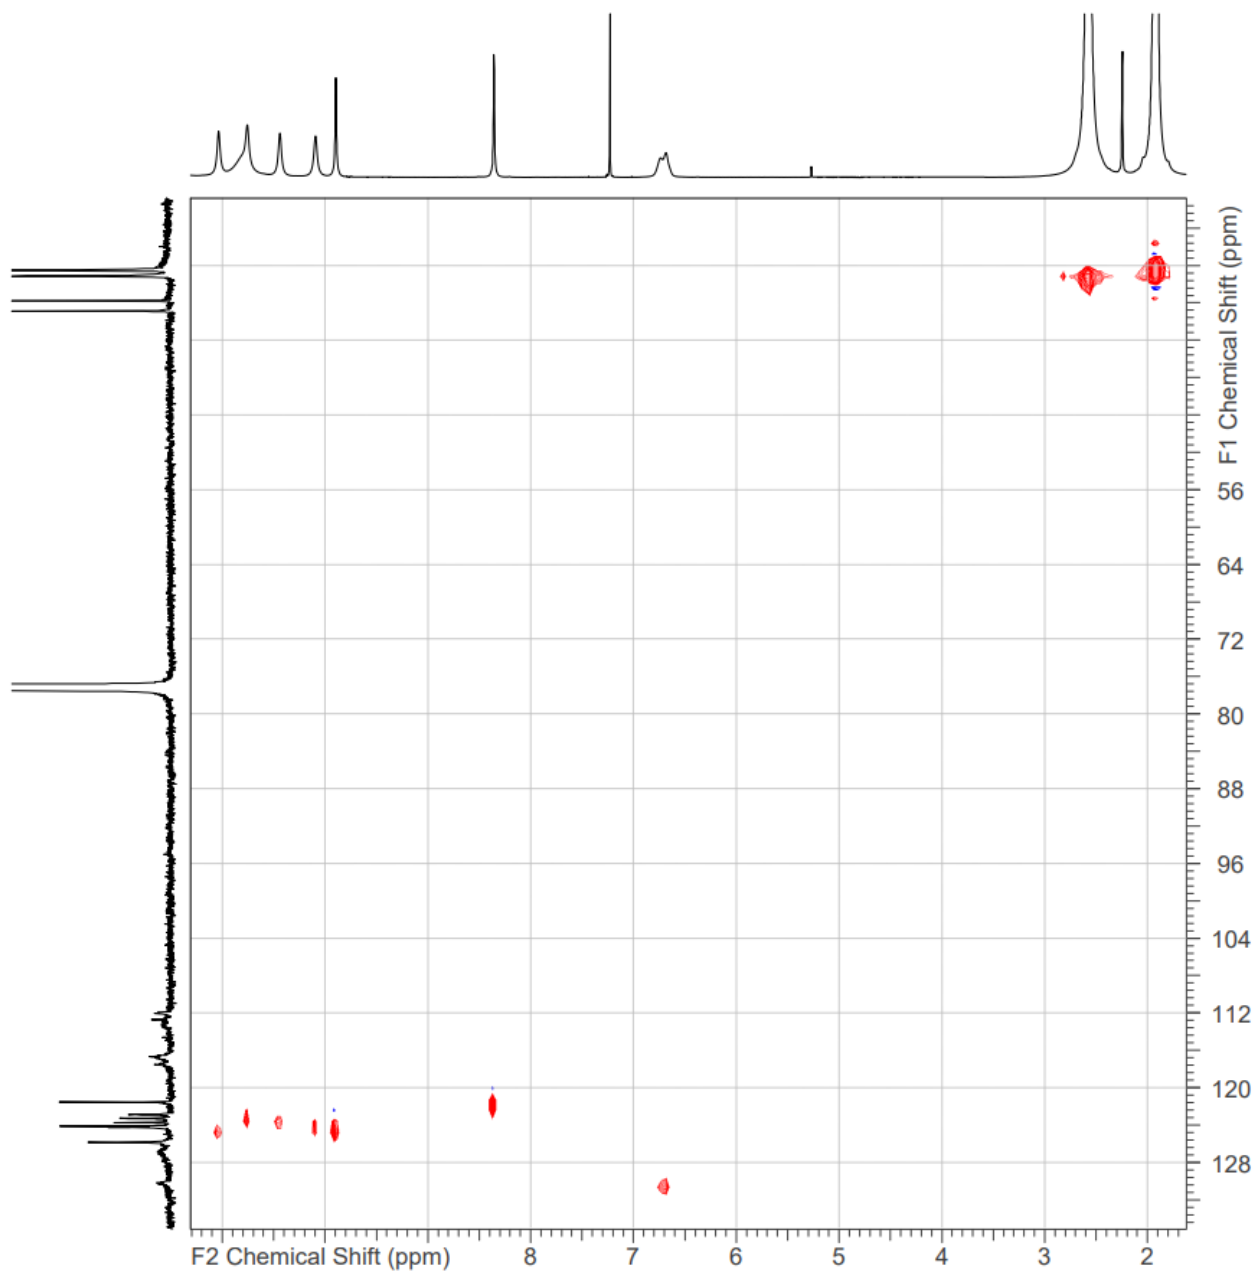

**Fig. S36.**  $^1\text{H}$ - $^{13}\text{C}$  HSQC NMR spectrum (500 MHz,  $\text{CDCl}_3$ ) of **CoPc-Frog**.

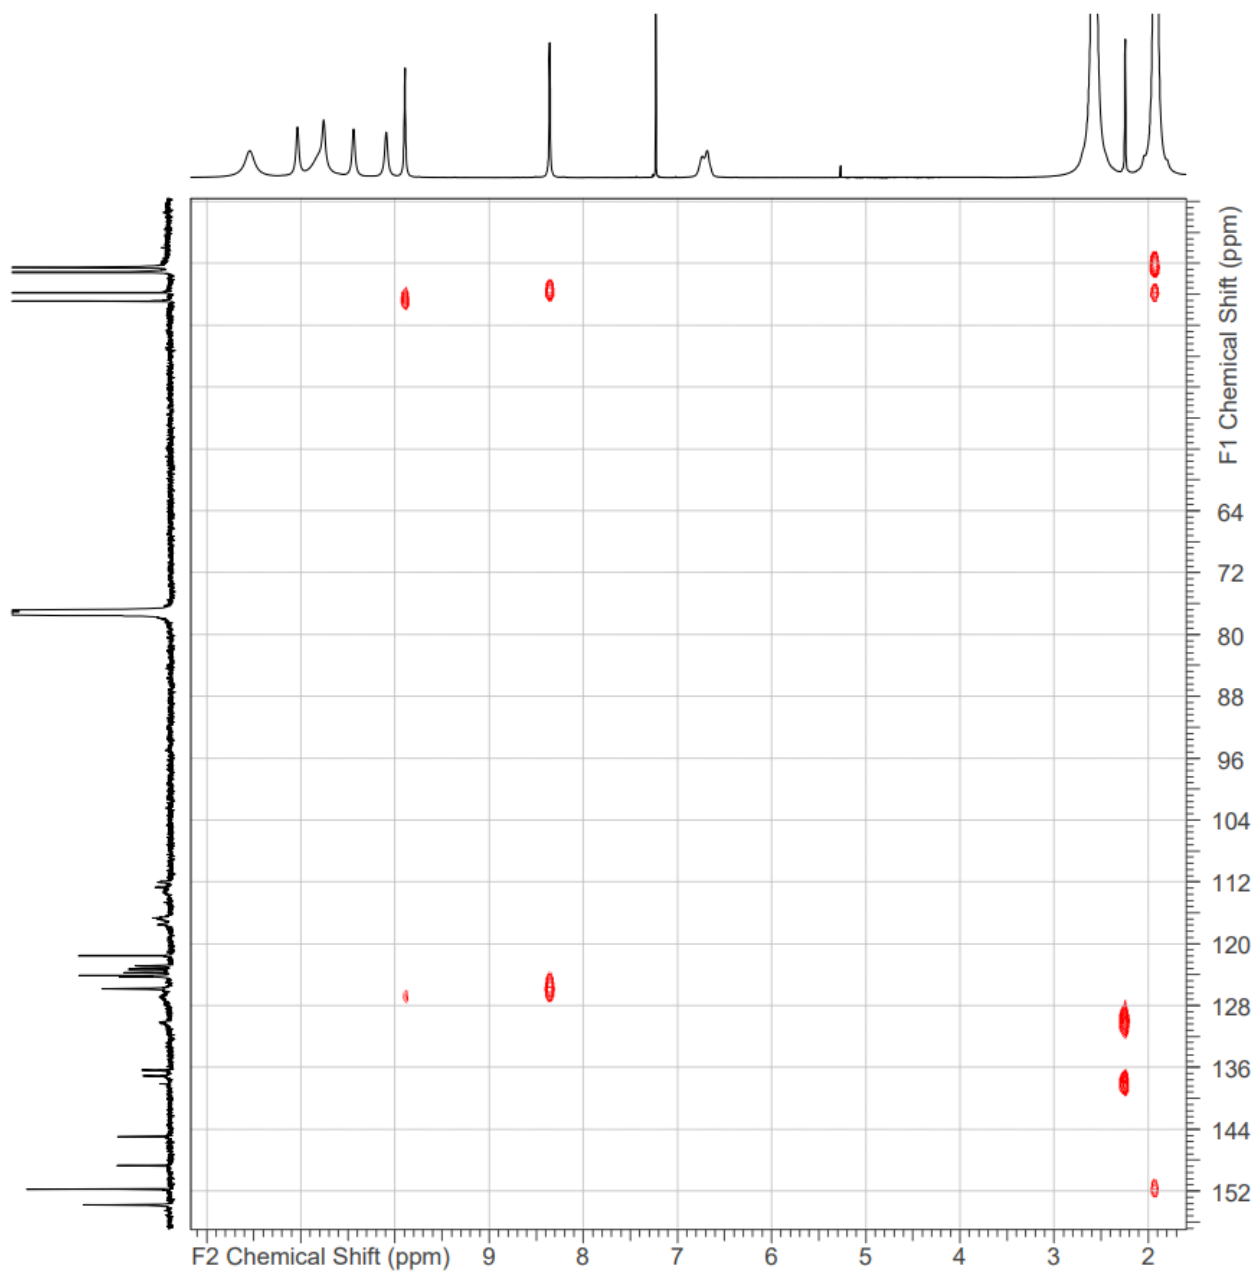

**Fig. S37.**  $^1\text{H}$ - $^{13}\text{C}$  HMBC NMR spectrum (500 MHz,  $\text{CDCl}_3$ ) of **CoPc-Frog**.
